# Supplementary material for: Making Home Sweet and Sturdy: Toxoplasma gondii ppGalNAc-Ts Glycosylate in Hierarchical Order and Confer Cyst Wall Rigidity
Source: PubMed Central journal article supplement (PMC5225312; doi:10.1128/mbio.02048-16), 2017-01-10
Supplement: mbo001163142s1.pdf [file mbo001163142s1.pdf]

LOCUS pUC19\_T1KO\_vecto 7001 bp T1KO DNA

vecto 27-APR-2014

DEFINITION Concatenation of 7 sequences.

ACCESSION urn.local...1317843251376.24

VERSION urn.local...1317843251376.24

KEYWORDS .

SOURCE

ORGANISM

.  
UNIMARK pUC19 T1KO vecto features  
pUC19 T1KO vecto

ORIGIN

Features

source 1..415  
/organism="Cloning vector pUC19"  
/mol\_type="other DNA"  
/label="source Cloning vector pUC19"

misc\_feature 1..415  
/label="pUC19 5' (concatenated sequence 1)"  
/note="Geneious type: Concatenated sequence"

misc\_feature 1..7001  
/5'term=""  
/3'term=""  
/5'overhang=""  
/3'overhang=""  
/5'strand="direct"  
/3'strand="direct"  
/5'type="blunt"  
/3'type="blunt"  
/fragment\_source="pUC19 T1KO vecto"  
/ugene\_name="Fragment (1-7001)"  
/ugene\_group="fragments"

CDS complement(146..415)  
/gene="lacZalpha"  
/codon\_start=1  
/product="beta-galactosidase alpha fragment"  
/translation="MTMITPSLHACRSTLEDPRVPSSNSLAVVLQRRDWENPGVTQLNRLAAHPPFASWRNSEEARTDRPSQQLRSLNGEWRLMRYFLLTHLCGISHS  
STICSDDAA"  
/label="lacZalpha CDS"

gene complement(146..415)  
/gene="lacZalpha"  
/label="lacZalpha gene"

misc\_feature 183..188  
/Recognition\_pattern="CA^TATG"  
/annotation\_group="CATATG"  
/label="NdeI"  
/note="Geneious type: restriction site"

misc\_feature 245..255  
/Recognition\_pattern="GCCNNNN^NGGC"

/label="lacZalpha gene"

misc\_feature 183..188

/Recognition\_pattern="CA^TATG"

/annotation\_group="CATATG"

/label="NdeI"

/note="Geneious type: restriction site"

misc\_feature 245..255

/Recognition\_pattern="GCCNNNN^NGGC"

/annotation\_group="GCCNNNNNGGC"

/label="BglI"

/note="Geneious type: restriction site"

primer\_bind 353..374

/created\_by="User"

/modified\_by="User"

/label="M13F"

misc\_feature complement(391..415)

/created\_by="User"

/label="pUC19productionR-Smi"

/note="Geneious type: primer\_bind\_reverse"

misc\_feature 396..415

/gene="lacZalpha"

/note="multiple cloning site (EcoRI-HindIII)"

/label="lacZalpha misc"

misc\_feature 396..401

/Recognition\_pattern="G^AATTC"

/annotation\_group="GAATTC"

/label="EcoRI"

/note="Geneious type: restriction site"

primer\_bind 401..439

/created\_by="User"

/label="Tlko-5'F /adp"

misc\_feature 402..407

/Recognition\_pattern="GAGCT^C"

/annotation\_group="GAGCTC"

/label="SacI"

/note="Geneious type: restriction site"

misc\_feature 412..415

/created\_by="User"

/modified\_by="User"

/label="SmiI5"

/note="Geneious type: restriction\_site"

source 416..419

/organism="Cloning vector pUC19"

/mol\_type="other DNA"

/label="source Cloning vector pUC19"

misc\_feature 416..419

/created\_by="User"

/modified\_by="User"

/label="SmiI3"

/note="Geneious type: restriction\_site"

misc\_feature 416..419

/label="SmiI3 add first (concatenated sequence 2)"

/note="Geneious type: Concatenated sequence"

misc\_recomb 420..1502

/created\_by="User"

/label="5'Recomb"

misc\_feature 420..1502

/label="Tlko - 5'Recomb (concatenated sequence 3)"

/note="Geneious type: Concatenated sequence"

primer\_bind 420..439

/created\_by="User"

/modified\_by="User"

/label="Tlko-5'F"

CDS 609..1061

/Source="annotation"

/isDeprecated=0

/label="CDS"

gene 609..1061

/Source="annotation"

/Note="hypothetical protein, conserved"

/soTerm="protein\_coding"

/product="hypothetical protein, conserved"

/taxon="Toxoplasma gondii ME49"

/isDeprecated=0

/isPseudo=0

/label="TGME49\_059540"

misc\_feature complement(1483..1517)

/created\_by="User"

/label="Tlko-5'R w/adp"

/note="Geneious type: primer\_bind\_reverse"

primer\_bind complement(1483..1502)

/created\_by="User"

/modified\_by="User"

/label="Tlko-5'R"

|                                                   |                        |
|---------------------------------------------------|------------------------|
| misc_feature                                      | 1503..1508             |
| /created_by="User"                                |                        |
| /label="KpnI"                                     |                        |
| /note="Geneious type: restriction_site"           |                        |
| misc_feature                                      | 1503..3442             |
| /label="HXGPRT w/ KpnI (concatenated sequence 4)" |                        |
| /note="Geneious type: Concatenated sequence"      |                        |
| primer_bind                                       | 1503..1529             |
| /created_by="User"                                |                        |
| /label="HXGPRT-KpnIF"                             |                        |
| gene                                              | 1509..3438             |
| /created_by="User"                                |                        |
| /label="DHFR-HXGPRT"                              |                        |
| misc_feature                                      | complement(1722..1744) |
| /created_by="User"                                |                        |
| /label="5ex2R"                                    |                        |
| /note="Geneious type: primer_bind_reverse"        |                        |
| misc_feature                                      | 1971..1973             |
| /Original_Base=""                                 |                        |
| /label=""                                         |                        |
| /note="Geneious type: Editing History Insertion"  |                        |
| misc_feature                                      | 1977..2669             |
| /label="HXGPRT"                                   |                        |
| /ugene_name="Selectable_Mark"                     |                        |
| primer                                            | 1984..2003             |
| /note="Oligo predicted by CLC primer designer"    |                        |
| /note="Oligo type: primer"                        |                        |
| /note="Melting temp.: 56.07"                      |                        |
| /label="HXGPRT detection"                         |                        |
| primer                                            | complement(2699..2720) |
| /note="Oligo predicted by CLC primer designer"    |                        |
| /note="Oligo type: primer"                        |                        |
| /note="Melting temp.: 54.02"                      |                        |
| /label="HXGPRT detection"                         |                        |
| misc_feature                                      | complement(3422..3442) |
| /created_by="User"                                |                        |
| /label="HXGPRT-KpnIR"                             |                        |
| /note="Geneious type: primer_bind_reverse"        |                        |
| primer_bind                                       | 3428..3463             |
| /created_by="User"                                |                        |
| /label="Tlko-3'F w/adp"                           |                        |
| misc_feature                                      | 3437..3442             |

/created\_by="User"  
 /modified\_by="User"  
 /label="KpnI"  
 /note="Geneious type: restriction\_site"

misc\_recomb 3443..4723  
 /created\_by="User"  
 /label="3'Recomb"

misc\_feature 3443..4723  
 /label="Tlko - 3'Recomb (concatenated sequence 5)"  
 /note="Geneious type: Concatenated sequence"

primer\_bind 3443..3463  
 /created\_by="User"  
 /label="Tlko-3'F"

misc\_feature 3443..4284  
 /Source="annotation"  
 /isDeprecated=0  
 /label="UTR"  
 /ugene\_name="UTR"

gene 3443..4284  
 /Source="annotation"  
 /Note="UDP-N-acetyl-D-galactosamine:polypeptide  
 N-acetylgalactosaminyltransferase T1, putative"  
 /soTerm="protein\_coding"  
 /product="UDP-N-acetyl-D-galactosamine:polypeptide  
 N-acetylgalactosaminyltransferase T1, putative"  
 /taxon="Toxoplasma gondii ME49"  
 /isDeprecated=0  
 /isPseudo=0  
 /label="TGME49\_059530"

misc\_feature complement(4703..4742)  
 /created\_by="User"  
 /label="Tlko-3'R w/adp"  
 /note="Geneious type: primer\_bind\_reverse"

primer\_bind complement(4703..4723)  
 /created\_by="User"  
 /label="Tlko-3'R"

source 4724..4727  
 /organism="Cloning vector pUC19"  
 /mol\_type="other DNA"  
 /label="source Cloning vector pUC19"

misc\_feature 4724..4727  
 /created\_by="User"

```

/modified_by="User"
/label="SmiI5"
/note="Geneious type: restriction_site"
misc_feature          4724..4727
/label="SmiI5 add second (concatenated sequence 6)"
/note="Geneious type: Concatenated sequence"
misc_feature          4728..4767
/gene="lacZalpha"
/note="multiple cloning site (EcoRI-HindIII)"
/label="lacZalpha misc"
CDS                   complement(4728..4784)
/gene="lacZalpha"
/codon_start=1
/product="beta-galactosidase alpha fragment"
/translation="MTMITPSLHACRSTLEDPRVPSNSLAVLQRRDWENPGVTQLNRLAAHPPFASWRNSEEARTD
RPSQQLRSLNGEWRLMRYFLLTHLCGISHRIWCTLSTICSDAA"
/label="lacZalpha CDS"
gene                  complement(4728..4784)
/gene="lacZalpha"
/label="lacZalpha gene"
source                4728..7001
/organism="Cloning vector pUC19"
/mol_type="other DNA"
/label="source Cloning vector pUC19"
misc_feature          4728..4731
/created_by="User"
/modified_by="User"
/label="SmiI3"
/note="Geneious type: restriction_site"
misc_feature          4728..7001
/label="pUC19 3' (concatenated sequence 7)"
/note="Geneious type: Concatenated sequence"
primer_bind           4728..4753
/created_by="User"
/label="pUC19productionF-Smi"
misc_feature          4732..4737
/Recognition_pattern="G^GATCC"
/annotation_group="GGATCC"
/label="BamHI"
/note="Geneious type: restriction site"
misc_feature          4738..4743
/Recognition_pattern="T^CTAGA"

```

/annotation\_group="TCTAGA"

/label="XbaI"

/note="Geneious type: restriction site"

misc\_feature 4744..4749

/Recognition\_pattern="G^TCGAC"

/annotation\_group="GTCGAC"

/label="SalI"

/note="Geneious type: restriction site"

misc\_feature 4750..4755

/Recognition\_pattern="CTGCA^G"

/annotation\_group="CTGCAG"

/label="PstI"

/note="Geneious type: restriction site"

misc\_feature 4762..4767

/Recognition\_pattern="A^AGCTT"

/annotation\_group="AAGCTT"

/label="HindIII"

/note="Geneious type: restriction site"

misc\_feature complement(4793..4816)

/created\_by="User"

/label="M13R"

/note="Geneious type: primer\_bind\_reverse"

-10\_signal complement(4829..4834)

/note="Plac promoter (drives lacZalpha;  
counter-clockwise); TATGTT"

/label="-10 signal"

-35\_signal complement(4853..4858)

/note="Plac promoter (drives lacZalpha;  
counter-clockwise); TTTACA"

/label="-35 signal"

protein\_bind complement(4878..4890)

/note="CAP protein binding site"

/bound\_moiety="catabolite activator protein (CAP)"

/label="CAP protein binding site protein bind"

rep\_origin complement(5182..5770)

/note="pMB1 origin of replication (counter-clockwise)  
(RNAII -35 to RNA/DNA switch point)"

/label="rep origin"

misc\_RNA complement(5182..5734)

/note="RNAII transcript (complementary strand)"

/label="RNA"

-35\_signal 5588..5593

```

/note="RNAI promoter (clockwise); TTGAAG"
/label="RNAI promoter (clockwise); TTGAAG -35 signal"
-10_signal          5610..5615
/note="RNAI promoter (clockwise); GCTACA"
/label="RNAI promoter (clockwise); GCTACA -10 signal"
misc_RNA            5624..5731
/note="RNAI transcript"
/label="RNAI transcript"
-10_signal          complement(5744..5749)
/note="RNAII promoter (counter-clockwise); CGTAAT"
/label="-10 signal"
-35_signal          complement(5765..5770)
/note="RNAII promoter (counter-clockwise); TTGAGA"
/label="-35 signal"
CDS                  complement(5941..6801)
/gene="bla"
/note="ampR (confers resistance to ampicillin)"
/codon_start=1
/product="beta-lactamase"
/translation="MSIQHFRVALIPFFAAAFCLPVFAHPETLVKVKDAEDQLGARVGYIELDLNSGKILESFRPEERF
PMMSTFKVLLCGAVLSRIDAGQEQLGRRIHYSQNDLVEYSPVTEKHLTDGMTVRELCSAAITMSDNTAANLLLLTTIGG
PKELTAFLHNMGDHVTRLDRWEPELNEAIPNDERDTTMPVAMATTLRKLTTGELLTLASRQQQLIDWMEADKVAGPLL
RSALPAGWFIADKSGAGERGSRGIIAALGPDGKPSRIVVIYTTGSQATMDERNRQIAEIGASLIKHW"
/label="bla CDS"
gene                  complement(5941..6801)
/gene="bla"
/label="bla gene"
misc_feature         6128..6138
/Recognition_pattern="GCCNNNN^NGGC"
/annotation_group="GCCNNNNNGGC"
/label="BglI"
/note="Geneious type: restriction site"
sig_peptide          complement(6733..6801)
/gene="bla"
/note="required for secretion to the periplasm; cleaved
off to form the mature beta-lactamase protein."
/label="bla signal peptide"
-10_signal          complement(6845..6850)
/note="bla promoter (counter-clockwise); GAGACA"
/label="-10 signal"
-35_signal          complement(6866..6871)
/note="bla promoter (counter-clockwise); TTCAA"

```





1410 1420 1430 1440  
TGCTCCCCCGGATGAATCCCCGCATGATGGCATAAGTCGAG 1440  
ACACCCGAAACAGTCGTTCTGAAGTGTCATTTCTTCTTTT 1480  
GTCGCCACATGCGTCTCTGCTTGGTACCTTGATCAGCACG 1520  
AAACCTTGCATTCAAACCCGCCCGCGGAAGATCCGATCTT 1560  
GCTGCTGTTTCGAGTCCCAGTAGCGTCCTGTTCGGCCGCGC 1600

1610 1620 1630 1640  
CGTCTCTGTTGGTGGGCAGCCGCTACACCTGTTATCTGAC 1640  
TGCCGTGCGCGAAAATGACGCCATTTTTGGGAAAATCGGG 1680  
GAACCTCATTCTTTAAAAGTATGCGGAGTTTCCTTTTTC 1720  
TTCTGTTCTTTCTTTTCTCGGGTTTGATAACCGTGTTT 1760  
GATGTAAGCACTTTCGGTCTCTCCTCCGTGCTTTGTTTGA 1800

1810 1820 1830 1840  
CATCGAGACCAGGTGTGCAGATCCTTCGCTTGTCGATCCG 1840  
GAGACGCGTGTCTCGTAGAACCTTTTCATTTTACCACACG 1880  
GCAGTGCAGGAGCACTGCTCTGAGTGCAGCAGGGACGGGTG 1920  
AAGTTTCGCTTTAGTAGTGCCTTCTGCTCTACGGGGCGT 1960  
TGTCAGATCCAGCAAATGGCGTCAAACCCATTGAAGAC 2000

2010 2020 2030 2040  
TACGGCAAGGGCAAGGGCCGTATTGAGCCCATGTATATCC 2040  
CCGACAACACCTTCTACAACGCTGATGACTTTCTTGTGCC 2080  
CCCCCACTGCAAGCCCTACATTGACAAAATCCTCCTCCCT 2120  
GGTGGATTGGTCAAGGACAGAGTTGAGAAGTTGGCGTATG 2160  
ACATCCACAGAACTTACTTCGGCGAGGAGTTGCACATCAT 2200

2210 2220 2230 2240  
TTGCATCCTGAAAGGCTCTCGCGGCTTCTTCAACCTTCTG 2240  
ATCGACTACCTTGCCACCATAACAGAAGTACAGTGGTCTGTG 2280  
AGTCCAGCGTGCCCCCTTCTTCGAGCACTATGTCCGCCT 2320  
GAAGTCTTACCAGAACGACAACAGCACAGGCCAGCTCACC 2360  
GTCTTGAGCGACGACTTGTCAATCTTTCGCGACAAGCACG 2400

2410 2420 2430 2440  
TTCTGATTGTTGAGGACATCGTCGACACCGGTTTCAACCCT 2440  
CACCGAGTTCGGTGAGCGCCTGAAAGCCGTTCGGTCCCAAG 2480  
TCGATGAGAATCGCCACCCTCGTCGAGAAGCGCACAGATC 2520  
GCTCCAACAGCTTGAAGGGCGACTTCGTCGGCTTTCAGCAT 2560  
TGAAGACGTCTGGATCGTTGGTTGCTGCTACGACTTCAAC 2600

2610 2620 2630 2640  
GAGATGTTCCGCGACTTCGACCACGTCGCCGTCCTGAGCG 2640  
ACGCCGCTCGCAAAAAGTTCGAGAAGTAAACCCTGCATAG 2680  
CCCTACAGAAGCTGCCCGTCTCTCGTTTTCTCTCTTTTC 2720  
GGAGGGATCAGGGAGAGTGCCTCGGGTCGGAGAGAGCTGA 2760  
CGAGGGGGTGCAGAGACCCCTGTGTCTTTATCGAAGAA 2800

2810 2820 2830 2840  
AAGGGATGACTCTTCATGTGGCATTTCACACAGTCTCACC 2840  
TCGCCTTGTTTTCTTTTTGTCAATCAGAACGAAAGCGAGT 2880  
TGCGGGTGACGCAGATGTGCGTGTATCCACTCGTGAATGC 2920  
GTTATCGTTCTGTATGCCGCTAGAGTGCTGGACTGTTGCT 2960  
GTCTGCCACGACAGCAGACAACCTTTCCTTCTATGCACTT 3000  
3010 3020 3030 3040  
GCAGGATGGTGCAGCGCAAACGACGGAGAGAAAGGAGCAC 3040  
CCTCTCAGTTTTCCCTACGATGTGCTGTCAGTTTCGACTCT 3080  
TCACCGCGAACGATTGGCGATACTCTCTGTTGACTTGTT 3120  
AGGCTCCGACCACGAAGCTCCCTTAACTAAATAAGCCGCG 3160  
ACACCTAAGTGTACACCATTTGCAGATCGATAATCTGCGA 3200  
3210 3220 3230 3240  
CCGCTGAATCCGTCCAGATCAGGAAAACCGCACCACCTAA 3240  
GTGTAAACCTTGTTTAGGTCGATAAAATGCTACCAACCCC 3280  
CACCCACAATCGAGCCTTGAGCGTTTCTGCGCACGCGTTG 3320  
GCCTACGTGACTTGCTGATGCCTGCCTCTGGCCATTCATG 3360  
CCAGTCAGTGCGCATAAAAATGTGGACACAGTCGGTTGAC 3400  
3410 3420 3430 3440  
AAGTGTTCTGGCAGGCTACAGTGACACCGCGGTGGAGGTA 3440  
CCGCAAGACCGCACACAGGAACGTGTGAGACGGAACAAAAC 3480  
GGATTTTTGACGACACGTCTCGGTGTCCCCTACCCACTTC 3520  
AGTCTACTTTTCAGTTTTCGTCTGCTCTCCCACGCAATTCCT 3560  
CGCGCGCTTGGGATCTGGGGAATGTGTTTCTTCCGATGCC 3600  
3610 3620 3630 3640  
CATAGGCGAAACGTCTTCTTCCGAGTACAGAGGCCACAAG 3640  
GGTAGTGCCGTTTTTAGAAACAGTATTCACATGCTAGAGG 3680  
GTTTGCGTCTTTGCTGTGCCTGACGCAATGGAAAGGGAA 3720  
ATAAATCTACGGTAAACGAGGAGTCGCATCTGCTAGTTGG 3760  
ATCCGGCTGGCATCCACAGCGGGCGGGGCGTGGGTCCGTG 3800  
3810 3820 3830 3840  
GAAACAGGCAAAATCCGAGTGAATATAATACCGATGCGTG 3840  
GGCGGAAATGTGAGGGCCTTGCGGGGAGGACTGGGACAAC 3880  
GTTTCGGCTGAACTGCGCTTGAGAGAAAGGAGTGGGTGAAG 3920  
CTCTGACGGGGAGATGCCTCGCGTTTTTCGTCCGTTTGAGG 3960  
GCACCGCAGATTGGGGTCCCAGGCGACCCGTCGATACACC 4000  
4010 4020 4030 4040  
CACAGAATGTTTTCGGTAAAACCATCGTTCAGGAAGGATT 4040  
CGCTTTTGCAAAACCGTGAAAGACATCAACCTGGTCTTTC 4080  
TTTGGAGGGCAGAACCAAAGCGAGGCACGAATGGTTTGT 4120  
TCTGGGCCACACTGATAGTTAAATTTCTTCCCCATACTT 4160  
TCGCATTCTGTTTCCCATTTGGACTGCAAGCTCAGAGATA 4200

4210 4220 4230 4240  
GCTTAGAACCGTACCGATTGGGATTGCAGTATTAACGGGA 4240  
GAAAAGTATTTTCGGCATCAAGCTACTTTCCTCCCCGTCT 4280  
TTACTCGAGGAGAAAAGGCGCAGTGTTGGTTCATACGTAT 4320  
ATATACGCGCTATCGCTGTTGTGGAAAAAGGGTTCAGCAG 4360  
AGAGATTGTGGTGTACGCAGGAGTAACCATAAGGTAAGT 4400

4410 4420 4430 4440  
CCATGTTGGGCTCTTATGGTACTCAGTGCATCCCGCGGCT 4440  
GGGGGCTGAAATACAAAGAAATGCTGTTCCCTCCTGCACA 4480  
AGACGCATCTGAATACTAACCGCCAGACATGAATATACTG 4520  
CTTCTGTGAATGCCAAAGTCTCGCGTGTAGAATTTCTAC 4560  
GCGGGGCAGTCGCCTAGCACCTGCTCACTTTTAGTCAGAT 4600

4610 4620 4630 4640  
TCATCGCAGCGGGAGAAACGCACAGTGCAGCTCGTTTGAA 4640  
AGCGGGATAATATGCGAGGCCCGCAAATATTTCTCACTT 4680  
CAAGCGAACGTCGACAGTACAGGCGTGTGGCTTTGAGC 4720  
ACGATTTAAATGGATCCTCTAGAGTCGACCTGCAGGCATG 4760  
CAAGCTTGGCGTAATCATGGTCATAGCTGTTTCCTGTGTG 4800

4810 4820 4830 4840  
AAATTGTTATCCGCTCACAAATTCACACAACATACGAGCC 4840  
GGAAGCATAAAGTGTAAGCCTGGGGTGCCTAATGAGTGA 4880  
GCTAACTCACATTAATTGCGTTGCGCTCACTGCCCGCTTT 4920  
CCAGTCGGGAAACCTGTCGTGCCAGCTGCATTAATGAATC 4960  
GGCCAACGCGCGGGGAGAGGCGGTTTGCGTATTGGGCGCT 5000

5010 5020 5030 5040  
CTTCCGCTTCCTCGCTCACTGACTCGCTGCGCTCGGTCGT 5040  
TCGGCTGCGGCGAGCGGTATCAGCTCACTCAAAGGCGGTA 5080  
ATACGGTTATCCACAGAATCAGGGGATAACGCAGGAAAGA 5120  
ACATGTGAGCAAAAGGCCAGCAAAAGGCCAGGAACCGTAA 5160  
AAAGGCCGCGTTGCTGGCGTTTTTCCATAGGCTCCGCCCC 5200

5210 5220 5230 5240  
CCTGACGAGCATCACAAAATCGACGCTCAAGTCAGAGGT 5240  
GGCGAAACCCGACAGGACTATAAAGATAACCAGGCGTTTCC 5280  
CCCTGGAAGCTCCCTCGTGCGCTCTCCTGTTCCGACCCTG 5320  
CCGCTTACCGGATACCTGTCCGCCTTTCTCCCTTCGGGAA 5360  
GCGTGGCGCTTTCTCATAGCTCACGCTGTAGGTATCTCAG 5400

5410 5420 5430 5440  
TTCGGTGTAGGTCGTTTCGCTCCAAGCTGGGCTGTGTGCAC 5440  
GAACCCCCGTTTACGCCGACCGCTGCGCCTTATCCGGTA 5480  
ACTATCGTCTTGAGTCCAACCCGGTAAGACACGACTTATC 5520  
GCCACTGGCAGCAGCCACTGGTAACAGGATTAGCAGAGCG 5560  
AGGTATGTAGGCGGTGCTACAGAGTTCTTGAAGTGGTGGC 5600

5610 5620 5630 5640  
CTAACTACGGCTACACTAGAAGAACAGTATTTGGTATCTG 5640  
CGCTCTGCTGAAGCCAGTTACCTTCGGAAAAAGAGTTGGT 5680  
AGCTCTTGATCCGGCAAACAAACCACCGCTGGTAGCGGTG 5720  
GTTTTTTTGGTTGCAAGCAGCAGATTACGCGCAGAAAAAA 5760  
AGGATCTCAAGAAGATCCTTTTGATCTTTTCTACGGGGTCT 5800

5810 5820 5830 5840  
GACGCTCAGTGGAACGAAAACCTCACGTTAAGGGATTTTGG 5840  
TCATGAGATTATCAAAAAGGATCTTACCTAGATCCTTTT 5880  
AAATTAATAAATGAAGTTTTAAATCAATCTAAAGTATATAT 5920  
GAGTAAACTTGGTCTGACAGTTACCAATGCTTAATCAGTG 5960  
AGGCACCTATCTCAGCGATCTGTCTATTTTCGTTTCATCCAT 6000

6010 6020 6030 6040  
AGTTGCCCTGACTCCCCGTCGTGTAGATAACTACGATACGG 6040  
GAGGGCTTACCATCTGGCCCCAGTGCTGCAATGATACCGC 6080  
GAGACCCACGCTCACCGGCTCCAGATTTATCAGCAATAAA 6120  
CCAGCCAGCCGGAAGGGCCGAGCGCAGAAGTGGTCCCTGCA 6160  
ACTTTATCCGCCTCCATCCAGTCTATTAATTGTTGCCGGG 6200

6210 6220 6230 6240  
AAGCTAGAGTAAGTAGTTCGCCAGTTAATAGTTTGCGCAA 6240  
CGTTGTTGCCATTGCTACAGGCATCGTGGTGTACGCTCG 6280  
TCGTTTGGTATGGCTTCATTCAGCTCCGGTTCCCAACGAT 6320  
CAAGGCGAGTTACATGATCCCCCATGTTGTGCAAAAAAAGC 6360  
GGTTAGCTCCTTCGGTCTCCGATCGTTGTCAGAAGTAAG 6400

6410 6420 6430 6440  
TTGGCCCGCAGTGTTATCACTCATGGTTATGGCAGCACTGC 6440  
ATAATTCTCTTACTGTCATGCCATCCGTAAGATGCTTTTC 6480  
TGTGACTGGTGAAGTACTCAACCAAGTCATTCTGAGAATAG 6520  
TGTATGCGGCGACCGAGTTGCTCTTGCCCCGGCGTCAATAC 6560  
GGGATAAATACCGCGCCACATAGCAGAACTTTAAAAGTGCT 6600

6610 6620 6630 6640  
CATCATTGAAAACGTTCTTCGGGGCGAAAACCTCAAGG 6640  
ATCTTACCGCTGTTGAGATCCAGTTCGATGTAACCCACTC 6680  
GTGCACCCAACCTGATCTTCAGCATCTTTTACTTTCACCAG 6720  
CGTTTCTGGGTGAGCAAAAACAGGAAGGCAAAATGCCGCA 6760  
AAAAAGGGAATAAGGGCGACACGAAATGTTGAATACTCA 6800

6810 6820 6830 6840  
TACTCTTCCTTTTTCAATATTATTGAAGCATTATCAGGG 6840  
TTTATTGTCTCATGAGCGGATACATATTTGAATGTATTTAG 6880  
AAAAATAAACAAATAGGGGTTCCGCGCACATTTCCCCGAA 6920  
AAGTGCCACCTGACGTCTAAGAAACCATTATTATCATGAC 6960  
ATTAACCTATAAAAATAGGCGTATCACGAGGCCCTTTCGT 7000

7010            7020            7030            7040

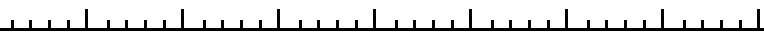

C 7001

LOCUS pUC19\_T2KO\_vecto 6691 bp DNA

circular UNA 17-DEC-2012

DEFINITION Concatenation of 5 sequences.

ACCESSION urn.local...1317875701146.8

VERSION urn.local...1317875701146.8

KEYWORDS .

SOURCE

ORGANISM

.

ORIGIN

Features

source 1..415  
/organism="Cloning vector pUC19"  
/mol\_type="other DNA"  
/label="source Cloning vector pUC19"

---

CDS complement(146..415)  
/gene="lacZalpha"  
/codon\_start=1  
/product="beta-galactosidase alpha fragment"  
/translation="MTMITPSLHACRSTLEDPRVPSNSLAVVLQRRDWENPGVTQLNRLAAHPPFASWRNSEEARTDRPSQQLRSLNGEWRLMRYFLLTHLCGISHS  
STICSDAA"  
/label="lacZalpha CDS"

---

gene complement(146..415)  
/gene="lacZalpha"  
/label="lacZalpha gene"

---

misc\_feature 183..188  
/Recognition\_pattern="CA^TATG"  
/annotation\_group="CATATG"  
/label="NdeI"  
/note="Geneious type: restriction site"

---

misc\_feature 245..255  
/Recognition\_pattern="GCCNNNN^NGGC"  
/annotation\_group="GCCNNNNNGGC"  
/label="BglI"  
/note="Geneious type: restriction site"

---

misc\_feature complement(391..415)  
/created\_by="User"  
/label="pUC19productionR-Smi"  
/note="Geneious type: primer\_bind\_reverse"

---

misc\_feature 396..415  
/gene="lacZalpha"  
/note="multiple cloning site (EcoRI-HindIII)"  
/label="lacZalpha misc"

---

misc\_feature 396..401  
/Recognition\_pattern="G^AATTC"  
/annotation\_group="GAATTC"  
/label="EcoRI"  
/note="Geneious type: restriction site"

---

primer\_bind 401..440

/note="multiple cloning site (EcoRI-HindIII)"  
/label="lacZalpha misc"

misc\_feature 396..401  
/Recognition\_pattern="G^AATTC"  
/annotation\_group="GAATTC"  
/label="EcoRI"  
/note="Geneious type: restriction site"

primer\_bind 401..440  
/created\_by="User"  
/label="T2ko-5'F w/adp"

misc\_feature 402..407  
/Recognition\_pattern="GAGCT^C"  
/annotation\_group="GAGCTC"  
/label="SacI"  
/note="Geneious type: restriction site"

misc\_feature 412..415  
/created\_by="User"  
/modified\_by="User"  
/label="SmiI5"  
/note="Geneious type: restriction\_site"

misc\_feature 416..419  
/created\_by="User"  
/label="Smi3"  
/note="Geneious type: restriction\_site"

misc\_recomb 420..1336  
/created\_by="User"  
/label="5'Recomb"

primer\_bind 420..440  
/created\_by="User"  
/label="T2ko-5'F"

misc\_feature complement(1315..1351)  
/created\_by="User"  
/modified\_by="User"  
/label="T2ko-5'R w/adp"  
/note="Geneious type: primer\_bind\_reverse"

primer\_bind complement(1315..1336)  
/created\_by="User"  
/label="T2ko-5'R"

misc\_feature 1337..1342  
/created\_by="User"  
/label="KpnI"  
/note="Geneious type: restriction\_site"



|                                                  |                        |
|--------------------------------------------------|------------------------|
| primer_bind                                      | 1337..1363             |
| /created_by="User"                               |                        |
| /label="HXGPRT-KpnIF"                            |                        |
| gene                                             | 1343..3272             |
| /created_by="User"                               |                        |
| /label="DHFR-HXGPRT"                             |                        |
| misc_feature                                     | complement(1556..1578) |
| /created_by="User"                               |                        |
| /label="5ex2R"                                   |                        |
| /note="Geneious type: primer_bind_reverse"       |                        |
| misc_feature                                     | 1805..1807             |
| /Original_Bases                                  |                        |
| /label                                           |                        |
| /note="Geneious type: Editing History Insertion" |                        |
| Selectable_Mark                                  | 1811..2503             |
| /label="HXGPRT"                                  |                        |
| primer                                           | 1818..1837             |
| /note="Oligo predicted by CLC primer designer"   |                        |
| /note="Oligo type: primer"                       |                        |
| /note="Melting temp.: 56.07"                     |                        |
| /label="HXGPRT detection"                        |                        |
| primer                                           | complement(2533..2554) |
| /note="Oligo predicted by CLC primer designer"   |                        |
| /note="Oligo type: primer"                       |                        |
| /note="Melting temp.: 54.02"                     |                        |
| /label="HXGPRT detection"                        |                        |
| misc_feature                                     | complement(3256..3276) |
| /created_by="User"                               |                        |
| /label="HXGPRT-KpnIR"                            |                        |
| /note="Geneious type: primer_bind_reverse"       |                        |
| primer_bind                                      | 3262..3297             |
| /created_by="User"                               |                        |
| /label="T2ko-3'F w/adp"                          |                        |
| misc_feature                                     | 3271..3276             |
| /created_by="User"                               |                        |
| /modified_by="User"                              |                        |
| /label="KpnI"                                    |                        |
| /note="Geneious type: restriction_site"          |                        |
| misc_recomb                                      | 3277..4413             |
| /created_by="User"                               |                        |
| /modified_by="User"                              |                        |
| /label="3'Recomb"                                |                        |

primer\_bind 3277..3297

/created\_by="User"

/label="T2ko-3'F"

gene 3277..3840

/Source="annotation"

/Note="UDP-N-acetyl-D-galactosamine:polypeptide

N-acetylgalactosaminyltransferase T2"

/soTerm="protein\_coding"

/product="UDP-N-acetyl-D-galactosamine:polypeptide

N-acetylgalactosaminyltransferase T2"

/taxon="Toxoplasma gondii ME49"

/isDeprecated=0

/isPseudo=0

/label="TGME49\_058770"

UTR 3277..3840

/Source="annotation"

/isDeprecated=0

/label="UTR"

misc\_feature complement(4393..4432)

/created\_by="User"

/label="T2ko-3'R w/adpt"

/note="Geneious type: primer\_bind\_reverse"

primer\_bind complement(4393..4413)

/created\_by="User"

/label="T2ko-3'R"

misc\_feature 4414..4417

/created\_by="User"

/label="Smi5"

/note="Geneious type: restriction\_site"

misc\_feature 4418..4457

/gene="lacZalpha"

/note="multiple cloning site (EcoRI-HindIII)"

/label="lacZalpha misc"

source 4418..6691

/organism="Cloning vector pUC19"

/mol\_type="other DNA"

/label="source Cloning vector pUC19"

CDS complement(4418..4474)

/gene="lacZalpha"

/codon\_start=1

/product="beta-galactosidase alpha fragment"

/translation="MTMITPSLHACRSTLEDPRVPSSNSLAVVLQRRDWENPGVTQLNRLAAHPPFASWRNSEEARTD"

RPSQQLRSLNGEWRLMRYFLLTHLCGISHRIWCTLSTICSDAA"

/label="lacZalpha CDS"

gene complement(4418..4474)

/gene="lacZalpha"

/label="lacZalpha gene"

misc\_feature 4418..4421

/created\_by="User"

/modified\_by="User"

/label="SmiI3"

/note="Geneious type: restriction\_site"

primer\_bind 4418..4443

/created\_by="User"

/label="pUC19productionF-Smi"

misc\_feature 4422..4427

/Recognition\_pattern="G^GATCC"

/annotation\_group="GGATCC"

/label="BamHI"

/note="Geneious type: restriction site"

misc\_feature 4428..4433

/Recognition\_pattern="T^CTAGA"

/annotation\_group="TCTAGA"

/label="XbaI"

/note="Geneious type: restriction site"

misc\_feature 4434..4439

/Recognition\_pattern="G^TCGAC"

/annotation\_group="GTCGAC"

/label="SaiI"

/note="Geneious type: restriction site"

misc\_feature 4440..4445

/Recognition\_pattern="CTGCA^G"

/annotation\_group="CTGCAG"

/label="PstI"

/note="Geneious type: restriction site"

misc\_feature 4452..4457

/Recognition\_pattern="A^AGCTT"

/annotation\_group="AAGCTT"

/label="HindIII"

/note="Geneious type: restriction site"

-10\_signal complement(4519..4524)

/note="Plac promoter (drives lacZalpha;  
 counter-clockwise); TATGTT"

/label="-10 signal"

-35\_signal complement(4543..4548)

/note="Plac promoter (drives lacZalpha;  
 counter-clockwise); TTTACA"

/label="-35 signal"

protein\_bind complement(4568..4580)

/note="CAP protein binding site"

/bound\_moiety="catabolite activator protein (CAP)"

/label="CAP protein binding site protein bind"

rep\_origin complement(4872..5460)

/note="pMB1 origin of replication (counter-clockwise)  
 (RNAII -35 to RNA/DNA switch point)"

/label="rep origin"

misc\_RNA complement(4872..5424)

/note="RNAII transcript (complementary strand)"

/label="RNA"

-35\_signal 5278..5283

/note="RNAI promoter (clockwise); TTGAAG"

/label="RNAI promoter (clockwise); TTGAAG -35 signal"

-10\_signal 5300..5305

/note="RNAI promoter (clockwise); GCTACA"

/label="RNAI promoter (clockwise); GCTACA -10 signal"

misc\_RNA 5314..5421

/note="RNAI transcript"

/label="RNAI transcript"

-10\_signal complement(5434..5439)

/note="RNAII promoter (counter-clockwise); CGTAAT"

/label="-10 signal"

-35\_signal complement(5455..5460)

/note="RNAII promoter (counter-clockwise); TTGAGA"

/label="-35 signal"

CDS complement(5631..6491)

/gene="bla"

/note="ampR (confers resistance to ampicillin)"

/codon\_start=1

/product="beta-lactamase"

/translation="MSIQHFRVALIPFFAAAFCLPVFAHPETLVKVKDAEDQLGARVGYIELDLNSGKILESFRPEERF  
 PMMSTFKVLLCGAVLSRIDAGQEQLGRRIHYSQNDLVEYSPVTEKHLTDGMTVRELCSAAITMSDNTAANLLLLTTIGG  
 PKELTAF LHNMGDHSVTRLDRWEPELNEAIPNDERDTTMPVAMATTLRKLTLGELLTLASRQQLIDWMEADKVAGPLL  
 RSALPAGWFIADKSGAGERGSRGIIAALGPDGKPSRIVVIYTTGSQATMDERNRQIAEIGASLIKHW"

/label="bla CDS"

gene complement(5631..6491)

/gene="bla"





```
                2210      2220      2230      2240
|||||
agcgacgacttgtcaatctttcgcgacaagcacgttctga 2240
ttggttgaggacatcgtcgacaccggtttcaccctcaccga 2280
gttcggtgagcgcctgaaagccgctcggccccaaagtcgatg 2320
agaatcgccaccctcgtcgagaagcgcacagatcgctcca 2360
acagcttgaagggcgacttcgtcggcttcagcattgaaga 2400

                2410      2420      2430      2440
|||||
cgtctggatcgttggttgctgctacgacttcaacgagatg 2440
ttccgcgacttcgaccacgctcgccgctctgagcgacgccg 2480
ctcgcaaaaagttcgagaagtaaaccctgcatagccctac 2520
agaagctgcccgtctctcgttttccctctcttttcggaggg 2560
atcagggagagtgccctcgggtcggagagagctgacgaggg 2600

                2610      2620      2630      2640
|||||
ggtgccagagaccctgtgtcctttatcgaagaaaagggga 2640
tgactcttcatgtggcatttcacacagtctcacctcgct 2680
tgttttctttttgtcaatcagaacgaaagcgagttgcggg 2720
tgacgcagatgtgctgtatccactcgtgaatgcgttatc 2760
gttctgtatgccgctagagtgtgctggactggtgctgtctgc 2800

                2810      2820      2830      2840
|||||
ccacgacagcagacaactttccttctatgcacttgcagga 2840
tggtgcagcgcaaacgacggagagaaaggagcaccctctc 2880
agtttccctacgatgtgctgtcagtttcgactcttcaccg 2920
cgaacgattggcgatacgtctctggtgacttgttaggctc 2960
cgaccacgaagctcccttaactaaataagccgcgacacct 3000

                3010      3020      3030      3040
|||||
aaagtgtacaccatttgcagatcgataatctgcgaccgctg 3040
aatccgtccagatcaggaaaaccgcaccacctaagtgtaa 3080
accttggttaggtcgataaaatgctaccaacccccaccca 3120
caatcgagccttgagcgtttctgcgcacgcgctggcctac 3160
gtgacttgctgatgcctgcctctggccattcatgccagtc 3200

                3210      3220      3230      3240
|||||
agtgcgcataaaaaatgtggacacagtcggttgacaagtgt 3240
tctggcaggctacagtgacaccgcggtggaggtaccagcg 3280
taagcgagaaaacggcacacaaggcggccgtttcagttctc 3320
ccggcgttcgcaacgaaaccccccaaacggggaaaacggc 3360
gacaccaggaggcagaacggctatacgcgacgggggaga 3400

                3410      3420      3430      3440
|||||
aggcgatccacggaagagcacaccgctcgccgaatgcaga 3440
ctgcaaagagctgtacaaacgaaccggcgccacaaaaac 3480
gagcgtgtagataaacgaaaaaaagcagaatcgcgaaagt 3520
ggctggcgctccaactggcacgagaaattaggtgtacat 3560
acatatggtccgatgtacagacaccggaggaactccgagt 3600
```

3610 3620 3630 3640  
gtctctcgggtgtaaattccgcgtcttggtttctcctcgac 3640  
tcagaggggaaatagtgtacactgactttttctttcacat 3680  
cgaggctcagcgcgcagaacgtctcttttttccgtttgaa 3720  
gacacagtcgtcgggaagtctcttcttttggtgtagcgata 3760  
ctgctttcgcgtggtgctggcgaagcgccgagccgggttcc 3800

3810 3820 3830 3840  
atcaacagccggtttaaacaagatTTTTGAACTAAGAGACA 3840  
cagagccactgcattttgacgatcaagctgcattacatgt 3880  
agactttacactggctgtttcagtttccagcgaagcttcc 3920  
ttcgtctttttatTTTGCATACTGTTTTCGCAACGCGATG 3960  
ccgctcagcagcaggcagagcctctctcctggaggcgcag 4000

4010 4020 4030 4040  
tgTTTTCTTTTTCGTACACTGGATCGACCAGCCGTTGCG 4040  
gccgcgagtctctttcggagcagttccgcttctttgcccg 4080  
tacggggctctctgtgggggcagactcttaggcgaaagcag 4120  
cgagtgcggcgactctgtgtagtcgggagacgcgtggaaa 4160  
aagcgcggcgcgaaatggatttctggatgcggagaaagag 4200

4210 4220 4230 4240  
ttgagggtgtcgatctttcgcgaactggagtgattctggcc 4240  
tgctgttctcacaAAAAACAATGAGCATCTATGCCGGC 4280  
ttttgcgacttggagaagtgtactgacatctgttcgaggt 4320  
gttggagcgtaaactgttccttctgatctttcgggtggagt 4360  
ctttcaagctctcagttttctcgcctcttTGTGACCTTG 4400

4410 4420 4430 4440  
cggaagcgtttgcatttaaATGGATCCTCTAGAGTCGACC 4440  
tgcaggcatgcaagcttggcgtaatcatggTcatagctgt 4480  
ttcctgtgtgaaattgttatccgctcacaattccacacaa 4520  
catacgagccggaagcataaagtgtaaagcctggggTgcc 4560  
taatgagtgagctaactcacattaattgcgttgcgctcac 4600

4610 4620 4630 4640  
tgcccgctttccagtcgggaaacctgtcgtgccagctgca 4640  
ttaatgaatcggccaacgcgcggggagaggcggtttgcgt 4680  
attgggcgctcttccgcttcctcgcTcactgactcgcTgc 4720  
gctcggctcgttcggctgcggcgagcggTatcagctcactc 4760  
aaaggcggtaatacggttatccacagaatcaggggataac 4800

4810 4820 4830 4840  
gcaggaaagaacatgtgagcaaaaggccagcaaaaggcca 4840  
ggaaccgtaaaaaggccgcgttgctggcgtttttccatag 4880  
gctccgccccctgacgagcatcacaAAAATCGACGCTCA 4920  
agtcagaggtggcgaaaccgcagaggactataaagatacc 4960  
aggcgtttccccctggaagctccctcgtgcgctctcctgt 5000







LOCUS pUC19\_T3KO\_vecto 6864 bp DNA

circular UNA 17-DEC-2012

DEFINITION Concatenation of 5 sequences.

ACCESSION urn.local...1317877093660.24

VERSION urn.local...1317877093660.24

KEYWORDS .

SOURCE  
ORGANISM

.

ORIGIN

Features

source

1..415

/organism="Cloning vector pUC19"

/mol\_type="other DNA"

/label="source Cloning vector pUC19"

misc\_feature 1..419

/label="pUC19 5' (concatenated sequence 1)"

/note="Geneious type: Concatenated sequence"

CDS complement(146..415)

/gene="lacZalpha"

/codon\_start=1

/product="beta-galactosidase alpha fragment"

/translation="MTMITPSLHACRSTLEDPRVPSSNSLAVVLQRRDWNPGVTQLNRLAAHPPFASWRNSEEARTDRPSQQLRSLNGEWRLMRYFLLTHLCGISHTICSDAA"

/label="lacZalpha CDS"

gene complement(146..415)

/gene="lacZalpha"

/label="lacZalpha gene"

misc\_feature 183..188

/Recognition\_pattern="CA^TATG"

/annotation\_group="CATATG"

/label="NdeI"

/note="Geneious type: restriction site"

misc\_feature 245..255

/Recognition\_pattern="GCCNNNN^NGGC"

/annotation\_group="GCCNNNNNGGC"

/label="BglI"

/note="Geneious type: restriction site"

misc\_feature complement(391..415)

/created\_by="User"

/label="pUC19productionR-Smi"

/note="Geneious type: primer\_bind\_reverse"

misc\_feature 396..415

/gene="lacZalpha"

/note="multiple cloning site (EcoRI-HindIII)"

/label="lacZalpha misc"

misc\_feature 396..401

/Recognition\_pattern="G^AATTC"

/annotation\_group="GAATTC"

/note="Geneious type: primer\_bind\_reverse"

misc\_feature 396..415

/gene="lacZalpha"

/note="multiple cloning site (EcoRI-HindIII)"

/label="lacZalpha misc"

misc\_feature 396..401

/Recognition\_pattern="G^AATTC"

/annotation\_group="GAATTC"

/label="EcoRI"

/note="Geneious type: restriction site"

primer\_bind 401..440

/created\_by="User"

/label="T3ko-5'F w/adp"

misc\_feature 402..407

/Recognition\_pattern="GAGCT^C"

/annotation\_group="GAGCTC"

/label="SacI"

/note="Geneious type: restriction site"

misc\_feature 412..415

/created\_by="User"

/modified\_by="User"

/label="SmiI5"

/note="Geneious type: restriction\_site"

misc\_feature 416..419

/Original\_Bases

/label

/note="Geneious type: Editing History Insertion"

misc\_feature 416..419

/created\_by="User"

/label="Smi3"

/note="Geneious type: restriction\_site"

misc\_recomb 420..1465

/created\_by="User"

/label="5'Recomb"

misc\_feature 420..1465

/label="T3ko - 5'Recomb (concatenated sequence 2)"

/note="Geneious type: Concatenated sequence"

primer\_bind 420..440

/created\_by="User"

/label="T3ko-5'F"

misc\_feature complement(1445..1480)

/created\_by="User"

---

/label="T3ko-5'R w/adp"  
/note="Geneious type: primer\_bind\_reverse"

---

misc\_feature complement(1445..1465)  
/created\_by="User"  
/label="T3ko-5'R"  
/note="Geneious type: primer\_bind\_reverse"

---

misc\_feature 1466..3405  
/label="HXGPRT w/ KpnI (concatenated sequence 3)"  
/note="Geneious type: Concatenated sequence"

---

primer\_bind 1466..1492  
/created\_by="User"  
/label="HXGPRT-KpnIF"

---

misc\_feature 1466..1471  
/created\_by="User"  
/label="KpnI"  
/note="Geneious type: restriction\_site"

---

gene 1472..3401  
/created\_by="User"  
/label="DHFR-HXGPRT"

---

misc\_feature complement(1685..1707)  
/created\_by="User"  
/label="5ex2R"  
/note="Geneious type: primer\_bind\_reverse"

---

misc\_feature 1934..1936  
/Original\_Bases  
/label  
/note="Geneious type: Editing History Insertion"

---

Selectable\_Mark 1940..2632  
/label="HXGPRT"

---

primer 1947..1966  
/note="Oligo predicted by CLC primer designer"  
/note="Oligo type: primer"  
/note="Melting temp.: 56.07"  
/label="HXGPRT detection"

---

primer complement(2662..2683)  
/note="Oligo predicted by CLC primer designer"  
/note="Oligo type: primer"  
/note="Melting temp.: 54.02"  
/label="HXGPRT detection"

---

misc\_feature complement(3385..3405)  
/created\_by="User"  
/label="HXGPRT-KpnIR"

|                                                                                                       |                        |
|-------------------------------------------------------------------------------------------------------|------------------------|
| /note="Geneious type: primer_bind_reverse"                                                            |                        |
| primer_bind                                                                                           | 3391..3426             |
| /created_by="User"                                                                                    |                        |
| /modified_by="User"                                                                                   |                        |
| /label="T3ko-3'F w/adp"                                                                               |                        |
| misc_feature                                                                                          | 3400..3405             |
| /created_by="User"                                                                                    |                        |
| /modified_by="User"                                                                                   |                        |
| /label="KpnI"                                                                                         |                        |
| /note="Geneious type: restriction_site"                                                               |                        |
| misc_recomb                                                                                           | 3406..4586             |
| /created_by="User"                                                                                    |                        |
| /label="3'Recomb"                                                                                     |                        |
| misc_feature                                                                                          | 3406..4586             |
| /label="T3ko - 3'Recomb (concatenated sequence 4)"                                                    |                        |
| /note="Geneious type: Concatenated sequence"                                                          |                        |
| primer_bind                                                                                           | 3406..3426             |
| /created_by="User"                                                                                    |                        |
| /modified_by="User"                                                                                   |                        |
| /label="T3ko-3'F"                                                                                     |                        |
| gene                                                                                                  | 3406..3859             |
| /Source="annotation"                                                                                  |                        |
| /Note="UDP-N-acetyl-D-galactosamine:polypeptide<br>N-acetylgalactosaminyltransferase T3, putative"    |                        |
| /soTerm="protein_coding"                                                                              |                        |
| /product="UDP-N-acetyl-D-galactosamine:polypeptide<br>N-acetylgalactosaminyltransferase T3, putative" |                        |
| /taxon="Toxoplasma gondii ME49"                                                                       |                        |
| /isDeprecated=0                                                                                       |                        |
| /isPseudo=0                                                                                           |                        |
| /label="TGME49_118730"                                                                                |                        |
| UTR                                                                                                   | 3406..3859             |
| /Source="annotation"                                                                                  |                        |
| /isDeprecated=0                                                                                       |                        |
| /label="UTR"                                                                                          |                        |
| misc_feature                                                                                          | complement(4566..4605) |
| /created_by="User"                                                                                    |                        |
| /label="T3ko-3'R w/adp"                                                                               |                        |
| /note="Geneious type: primer_bind_reverse"                                                            |                        |
| misc_feature                                                                                          | complement(4566..4586) |
| /created_by="User"                                                                                    |                        |
| /label="T3ko-3'R"                                                                                     |                        |

/note="Geneious type: primer\_bind\_reverse"

misc\_feature 4587..4590

/Original\_Bases

/label

/note="Geneious type: Editing History Insertion"

misc\_feature 4587..6864

/label="pUC19 3' (concatenated sequence 5)"

/note="Geneious type: Concatenated sequence"

misc\_feature 4587..4590

/created\_by="User"

/label="Smi5"

/note="Geneious type: restriction\_site"

misc\_feature 4591..4630

/gene="lacZalpha"

/note="multiple cloning site (EcoRI-HindIII)"

/label="lacZalpha misc"

source 4591..6864

/organism="Cloning vector pUC19"

/mol\_type="other DNA"

/label="source Cloning vector pUC19"

CDS complement(4591..4647)

/gene="lacZalpha"

/codon\_start=1

/product="beta-galactosidase alpha fragment"

/translation="MTMITPSLHACRSTLEDPRVPSSNSLAVVLQRRDWENPGVTQLNRLAAHPPFASWRNSEEARTD  
RPSQQLRSLNGEWRLMRYFLLTHLCGISHRIWCTLSTICSDAA"

/label="lacZalpha CDS"

gene complement(4591..4647)

/gene="lacZalpha"

/label="lacZalpha gene"

primer\_bind 4591..4616

/created\_by="User"

/label="pUC19productionF-Smi"

misc\_feature 4591..4594

/created\_by="User"

/modified\_by="User"

/label="SmiI3"

/note="Geneious type: restriction\_site"

misc\_feature 4595..4600

/Recognition\_pattern="G^GATCC"

/annotation\_group="GGATCC"

/label="BamHI"

/note="Geneious type: restriction site"

misc\_feature 4601..4606

/Recognition\_pattern="T^CTAGA"

/annotation\_group="TCTAGA"

/label="XbaI"

/note="Geneious type: restriction site"

misc\_feature 4607..4612

/Recognition\_pattern="G^TCGAC"

/annotation\_group="GTCGAC"

/label="SallI"

/note="Geneious type: restriction site"

misc\_feature 4613..4618

/Recognition\_pattern="CTGCA^G"

/annotation\_group="CTGCAG"

/label="PstI"

/note="Geneious type: restriction site"

misc\_feature 4625..4630

/Recognition\_pattern="A^AGCTT"

/annotation\_group="AAGCTT"

/label="HindIII"

/note="Geneious type: restriction site"

-10\_signal complement(4692..4697)

/note="Plac promoter (drives lacZalpha;  
 counter-clockwise); TATGTT"

/label="-10 signal"

-35\_signal complement(4716..4721)

/note="Plac promoter (drives lacZalpha;  
 counter-clockwise); TTTACA"

/label="-35 signal"

protein\_bind complement(4741..4753)

/note="CAP protein binding site"

/bound\_moiety="catabolite activator protein (CAP)"

/label="CAP protein binding site protein bind"

rep\_origin complement(5045..5633)

/note="pMB1 origin of replication (counter-clockwise)  
 (RNAII -35 to RNA/DNA switch point)"

/label="rep origin"

misc\_RNA complement(5045..5597)

/note="RNAII transcript (complementary strand)"

/label="RNA"

-35\_signal 5451..5456

/note="RNAI promoter (clockwise); TTGAAG"



/label="RNAI promoter (clockwise); TTGAAG -35 signal"

-10\_signal 5473..5478

/note="RNAI promoter (clockwise); GCTACA"

/label="RNAI promoter (clockwise); GCTACA -10 signal"

misc\_RNA 5487..5594

/note="RNAI transcript"

/label="RNAI transcript"

-10\_signal complement(5607..5612)

/note="RNAII promoter (counter-clockwise); CGTAAT"

/label="-10 signal"

-35\_signal complement(5628..5633)

/note="RNAII promoter (counter-clockwise); TTGAGA"

/label="-35 signal"

CDS complement(5804..6664)

/gene="bla"

/note="ampR (confers resistance to ampicillin)"

/codon\_start=1

/product="beta-lactamase"

/translation="MSIQHFRVALIPFFAAFCPLVFAHPETLVKVKDAEDQLGARVGYIELDLNSGKILESFRPEERF  
 PMMSTFKVLLCGAVLSRIDAGQEQLGRRIHYSQNDLVEYSPVTEKHLTDGMTVRELCSAAITMSDNTAANLLLTIGG  
 PKELTAF LHNMGDHSVTRLDRWEP ELPNEAIPNDRDRTTMPVAMATTLRKL LTGELLTLASRQQLIDWMEADKVAGPLL  
 RSALPAGWFIADKSGAGERGSRGIIAALGPDGKPSRIVVIYTTGSQATMDERNRQIAEIGASLIKHW"

/label="bla CDS"

gene complement(5804..6664)

/gene="bla"

/label="bla gene"

misc\_feature 5991..6001

/Recognition\_pattern="GCCNNNN^NGGC"

/annotation\_group="GCCNNNNNGGC"

/label="BglI"

/note="Geneious type: restriction site"

sig\_peptide complement(6596..6664)

/gene="bla"

/note="required for secretion to the periplasm; cleaved  
 off to form the mature beta-lactamase protein."

/label="bla signal peptide"

-10\_signal complement(6708..6713)

/note="bla promoter (counter-clockwise); GAGACA"

/label="-10 signal"

-35\_signal complement(6729..6734)

/note="bla promoter (counter-clockwise); TTCAAA"

/label="-35 signal"



```
      1410      1420      1430      1440
|||||
cattccccctgtctcttccacgtttctgcacaagcacctc 1440
acgtgggtcggcgggtgctcatttgaaggtaccttgatcagc 1480
acgaaaccttgcattcaaaccgcccgcggaagatccgat 1520
cttgctgctgttcgcagtcctcagtagcgtcctgtcggccg 1560
cgccgtctctgttggtgggcagccgctacacctgttatct 1600

      1610      1620      1630      1640
|||||
gactgccgtgcgcgaaaatgacgccatTTTTGGGAAAATC 1640
ggggaaacttcattctttaaagtatgcggaggTTTCCTTT 1680
ttcttctgttcgTTTCTTTTTCTCGGGTTTGATAACCGTG 1720
ttcgatgtaagcactttccgtctctcctccgtgctttgtt 1760
cgacatcgagaccaggtgtgcagatccttcgcttgtcgat 1800

      1810      1820      1830      1840
|||||
ccggagacgcgtgtctcgtagaaccttttcattttaccac 1840
acggcagtgcgagcactgctctgagtgcagcagggacgg 1880
gtgaagtttcgctttagtagtgcgTTTCTGCTCTACGGGG 1920
cgttgtcagatccagcaaaatggcgtccaaaccattgaa 1960
gactacggcaagggcaagggccgtattgagcccatgtata 2000

      2010      2020      2030      2040
|||||
tccccgacaacaccttctacaacgctgatgactttcttgt 2040
gccccccactgcaagccctacattgacaaaatcctcctc 2080
cctgggtggattgggtcaaggacagagttgagaagttggcgt 2120
atgacatccacagaacttacttcggcgaggagttgcacat 2160
catttgcacctgaaaggctctcgcggcttcttcaacctt 2200

      2210      2220      2230      2240
|||||
ctgatcgactaccttgccaccatacagaagtacagtggtc 2240
gtgagtcacgcgtgcccccttcttcgagcactatgtccg 2280
cctgaagtcctaccagaacgacaacagcacaggccagctc 2320
accgtcttgagcgcgacttgtcaatcttctcgcgacaagc 2360
acgttctgattggtgaggacatcgtcgacaccggtttcac 2400

      2410      2420      2430      2440
|||||
cctcaccgagttcggtgagcgcctgaaagccgtcgggtccc 2440
aagtcgatgagaatcgccaccctcgtcgagaagcgcacag 2480
atcgctccaacagcttgaagggcgacttcgtcggcttcag 2520
cattgaagacgtctggatcgTTTGGTTGCTGCTACGACTTC 2560
aacgagatgTTCCGCGACTTCGACCACGTCGCCGTCCTGA 2600

      2610      2620      2630      2640
|||||
gcgacgccgctcgcAAAAAGTTCGAGAAGTAAACCCTGCA 2640
tagccctacagaagctgccgctctctcgTTTTCTCTCTT 2680
ttcggagggatcagggagagtgctcgggtcggagagagc 2720
tgacgaggggggtgccagagaccctgtgtcctttatcgaa 2760
gaaaagggatgactcttcatgtggcatttcacacagtctc 2800
```

```
      2810      2820      2830      2840
|||||
acctcgccttgttttcttttgtcaatcagaacgaaagcg 2840
agttgcgggtgacgcagatgtgctgtatccactcgtgaa 2880
tgcgttatcgttctgtatgccgctagagtgctggactgtt 2920
gctgtctgcccacgacagcagacaactttccttctatgca 2960
cttgcaggatggtgcagcgcgcaaacgacggagagaaaggag 3000

      3010      3020      3030      3040
|||||
caccctctcagtttccctacgatgtgctgtcagtttcgac 3040
tcttcaccgcgaacgattggcgatacgtctctgttgactt 3080
gttaggctccgaccacgaagctcccttaactaaataagcc 3120
gcgacacctaagtgtacaccatttgcagatcgataatctg 3160
cgaccgctgaatccgtccagatcaggaaaaccgcaccacc 3200

      3210      3220      3230      3240
|||||
taagtgtaaaccttgttttaggtcgataaaatgctaccaac 3240
ccccaccacaatcgagccttgagcgtttctgcgcacgcg 3280
ttggcctacgtgacttgctgatgcctgcctctggccattc 3320
atgccagtcagtgcgcataaaaatgtggacacagtcggtt 3360
gacaagtgttctggcaggctacagtgacaccgcggtggag 3400

      3410      3420      3430      3440
|||||
gtacctgctgcggctgctgtaaaactggttgttgcagctg 3440
ttgcagctggatccgaggatggttgagatcataaatgctc 3480
cgtttaagtaatgggtggttggcccaagtgccacagagaa 3520
aaatgcgatttgtagaaccgtaacgaagcgactggttcac 3560
ctaattcctgcgtggcaagtgactcccgtgcgggtgtctc 3600

      3610      3620      3630      3640
|||||
aacgggagaatggtctcagatttcaatggttgctttata 3640
tcatctcgattcactgagcgtcagctcttcaatacattaa 3680
ggcggccgacagttgtgccccagaccatgtataggcact 3720
cgcgcaaaggggtcccgtggtcattccttcaggaaagcttg 3760
ttgtgctccccataacttgtcttttcaagctattcgattc 3800

      3810      3820      3830      3840
|||||
tctagattccgtgtacgaaccctgaaccgggtcaactca 3840
tccgcttgattcgcacgtctacacagaaccaatgaact 3880
acaccaatgcacgcagctctagaaaactgtccaataccttc 3920
agaagggtggtgaactcgtgctcgagatacgttaacttccc 3960
atgcattagtctggttactgggaagagattcgttagttcg 4000

      4010      4020      4030      4040
|||||
gcgctacgttgtagtcagaattcttggttgtctgatgaaa 4040
cacaagagcgcctcttgaccgcgaagtactgcgggtgagc 4080
atgtagacgccagcagcagtggttctcattcgaacagggaa 4120
ttcccacgtagctccgcacgacctgacaacttcgggtgtg 4160
tgtgcattctgtatactgattgagctcacttggtaaaacc 4200
```



5610 5620 5630 5640  
cagcagattacgcgcagaaaaaaggatctcaagaagatc 5640  
ctttgatcttttctacggggtctgacgctcagtggaacga 5680  
aaactcacgttaagggattttggatcatgagattatcaaaa 5720  
aggatcttcacctagatccttttaaatataaaatgaagtt 5760  
ttaaatacaatctaaagtatatatgagtaaacttgggtctga 5800

5810 5820 5830 5840  
cagttaccaatgcttaatcagtgaggcacctatctcagcg 5840  
atctgtctatttcggtcatccatagttgcctgactccccg 5880  
tcgtgtagataactacgatacgggagggcttaccatctgg 5920  
ccccagtgctgcaatgataccgcgagaccacgctcaccg 5960  
gctccagatttatcagcaataaaccagccagccggaaggg 6000

6010 6020 6030 6040  
ccgagcgcagaagtggctcctgcaactttatccgcctccat 6040  
ccagtctattaattggtgcccgggaagctagagtaagtagt 6080  
tcgccagttaatagtttgcgcaacgttggtgcatgcta 6120  
caggcatcgtgggtgtcacgctcgtcgtttggtatggcttc 6160  
attcagctccggttcccaacgatcaaggcgagttacatga 6200

6210 6220 6230 6240  
tccccatgttgtgcaaaaaagcggttagctccttcggctc 6240  
ctccgatcgttgtcagaagtaagttggccgcagtggtatc 6280  
actcatggttatggcagcactgcataattctcttactgtc 6320  
atgccatccgtaagatgcttttctgtgactggtgagtact 6360  
caaccaagtcatctgagaatagtgatgcggcgaccgag 6400

6410 6420 6430 6440  
ttgctcttgcccggcgtcaatacgggataataccgcgcca 6440  
catagcagaactttaaagtgctcatcattggaaaacgtt 6480  
cttcggggcgaaaactctcaaggatcttaccgctggtgag 6520  
atccagttcgatgtaaccactcgtgcaccaactgatct 6560  
tcagcatcttttactttcaccagcgtttctgggtgagcaa 6600

6610 6620 6630 6640  
aaacaggaaggcaaaatgccgcaaaaaaggggaataagggc 6640  
gacacggaaatggtgaatactcatactcttcctttttcaa 6680  
tattattgaagcatttatcagggttattgtctcatgagcg 6720  
gatacatatttgaatgtatttagaaaaataaacaataagg 6760  
ggttccgcgcacatttccccgaaaagtgccacctgacgctc 6800

6810 6820 6830 6840  
taagaaaccattattatcatgacattaacctataaaaata 6840  
ggcgtatcacgaggccctttcgtc 6864

LOCUS pUC19\_T4KO\_vecto 7070 bp DNA

circular UNA 17-DEC-2012

DEFINITION Concatenation of 5 sequences.

ACCESSION urn.local...1317877761435.35

VERSION urn.local...1317877761435.35

KEYWORDS .

SOURCE  
ORGANISM

.

ORIGIN

Features

source

1..415

/organism="Cloning vector pUC19"

/mol\_type="other DNA"

/label="source Cloning vector pUC19"

misc\_feature 1..419

/label="pUC19 5' (concatenated sequence 1)"

/note="Geneious type: Concatenated sequence"

CDS complement(146..415)

/gene="lacZalpha"

/codon\_start=1

/product="beta-galactosidase alpha fragment"

/translation="MTMITPSLHACRSTLEDPRVPSSNSLAVVLQRRDWENPGVTQLNRLAAHPPFASWRNSEEARTDRPSQQLRSLNGEWRLMRYFLLTHLCGISHTICSDAA"

/label="lacZalpha CDS"

gene complement(146..415)

/gene="lacZalpha"

/label="lacZalpha gene"

misc\_feature 183..188

/Recognition\_pattern="CA^TATG"

/annotation\_group="CATATG"

/label="NdeI"

/note="Geneious type: restriction site"

misc\_feature 245..255

/Recognition\_pattern="GCCNNNN^NGGC"

/annotation\_group="GCCNNNNNGGC"

/label="BglI"

/note="Geneious type: restriction site"

misc\_feature complement(391..415)

/created\_by="User"

/label="pUC19productionR-Smi"

/note="Geneious type: primer\_bind\_reverse"

misc\_feature 396..415

/gene="lacZalpha"

/note="multiple cloning site (EcoRI-HindIII)"

/label="lacZalpha misc"

misc\_feature 396..401

/Recognition\_pattern="G^AATTC"

/annotation\_group="GAATTC"

/note="Geneious type: primer\_bind\_reverse"

misc\_feature 396..415

/gene="lacZalpha"

/note="multiple cloning site (EcoRI-HindIII)"

/label="lacZalpha misc"

misc\_feature 396..401

/Recognition\_pattern="G^AATTC"

/annotation\_group="GAATTC"

/label="EcoRI"

/note="Geneious type: restriction site"

primer\_bind 401..440

/created\_by="User"

/label="T4ko-5'F w/adp"

misc\_feature 402..407

/Recognition\_pattern="GAGCT^C"

/annotation\_group="GAGCTC"

/label="SacI"

/note="Geneious type: restriction site"

misc\_feature 412..415

/created\_by="User"

/modified\_by="User"

/label="SmiI5"

/note="Geneious type: restriction\_site"

misc\_feature 416..419

/Original\_Bases

/label

/note="Geneious type: Editing History Insertion"

misc\_feature 416..419

/created\_by="User"

/label="Smi3"

/note="Geneious type: restriction\_site"

misc\_recomb 420..1687

/created\_by="User"

/label="5'Recomb"

misc\_feature 420..1687

/label="T4ko - 5'Recomb (concatenated sequence 2)"

/note="Geneious type: Concatenated sequence"

primer\_bind 420..440

/created\_by="User"

/label="T4ko-5'F"

misc\_feature complement(1667..1702)

/created\_by="User"



---

/label="T4ko-5'R w/adp"  
/note="Geneious type: primer\_bind\_reverse"

---

misc\_feature complement(1667..1687)  
/created\_by="User"  
/label="T4ko-5'R"  
/note="Geneious type: primer\_bind\_reverse"

---

misc\_feature 1688..3627  
/label="HXGPRT w/ KpnI (concatenated sequence 3)"  
/note="Geneious type: Concatenated sequence"

---

primer\_bind 1688..1714  
/created\_by="User"  
/label="HXGPRT-KpnIF"

---

misc\_feature 1688..1693  
/created\_by="User"  
/label="KpnI"  
/note="Geneious type: restriction\_site"

---

gene 1694..3623  
/created\_by="User"  
/label="DHFR-HXGPRT"

---

misc\_feature complement(1907..1929)  
/created\_by="User"  
/label="5ex2R"  
/note="Geneious type: primer\_bind\_reverse"

---

misc\_feature 2156..2158  
/Original\_Bases  
/label  
/note="Geneious type: Editing History Insertion"

---

Selectable\_Mark 2162..2854  
/label="HXGPRT"

---

primer 2169..2188  
/note="Oligo predicted by CLC primer designer"  
/note="Oligo type: primer"  
/note="Melting temp.: 56.07"  
/label="HXGPRT detection"

---

primer complement(2884..2905)  
/note="Oligo predicted by CLC primer designer"  
/note="Oligo type: primer"  
/note="Melting temp.: 54.02"  
/label="HXGPRT detection"

---

misc\_feature complement(3607..3627)  
/created\_by="User"  
/label="HXGPRT-KpnIR"

/note="Geneious type: primer\_bind\_reverse"

primer\_bind 3613..3648

/created\_by="User"

/label="T4ko-3'F w/adp"

misc\_feature 3622..3627

/created\_by="User"

/modified\_by="User"

/label="KpnI"

/note="Geneious type: restriction\_site"

misc\_recomb 3628..4792

/created\_by="User"

/label="3'Recomb"

misc\_feature 3628..4792

/label="T4ko - 3'Recomb (concatenated sequence 4)"

/note="Geneious type: Concatenated sequence"

primer\_bind 3628..3648

/created\_by="User"

/label="T4ko-3'F"

misc\_feature complement(4772..4811)

/created\_by="User"

/label="T4ko-3'R w/adp"

/note="Geneious type: primer\_bind\_reverse"

misc\_feature complement(4772..4792)

/created\_by="User"

/modified\_by="User"

/label="T4ko-3'R"

/note="Geneious type: primer\_bind\_reverse"

misc\_feature 4793..4796

/Original\_Bases

/label

/note="Geneious type: Editing History Insertion"

misc\_feature 4793..7070

/label="pUC19 3' (concatenated sequence 5)"

/note="Geneious type: Concatenated sequence"

misc\_feature 4793..4796

/created\_by="User"

/label="Smi5"

/note="Geneious type: restriction\_site"

misc\_feature 4797..4836

/gene="lacZalpha"

/note="multiple cloning site (EcoRI-HindIII)"

/label="lacZalpha misc"

source 4797..7070  
/organism="Cloning vector pUC19"  
/mol\_type="other DNA"  
/label="source Cloning vector pUC19"

CDS complement(4797..4853)  
/gene="lacZalpha"  
/codon\_start=1  
/product="beta-galactosidase alpha fragment"  
/translation="MTMITPSLHACRSTLEDPRVPSNSLAVVLQRRDWENPGVTQLNRLAAHPPFASWRNSEEARTD  
RPSQQLRSLNGEWRLMRYFLLTHLCGISHRIWCTLSTICSDAA"  
/label="lacZalpha CDS"

gene complement(4797..4853)  
/gene="lacZalpha"  
/label="lacZalpha gene"

primer\_bind 4797..4822  
/created\_by="User"  
/label="pUC19productionF-Smi"

misc\_feature 4797..4800  
/created\_by="User"  
/modified\_by="User"  
/label="SmiI3"  
/note="Geneious type: restriction\_site"

misc\_feature 4801..4806  
/Recognition\_pattern="G^GATCC"  
/annotation\_group="GGATCC"  
/label="BamHI"  
/note="Geneious type: restriction site"

misc\_feature 4807..4812  
/Recognition\_pattern="T^CTAGA"  
/annotation\_group="TCTAGA"  
/label="XbaI"  
/note="Geneious type: restriction site"

misc\_feature 4813..4818  
/Recognition\_pattern="G^TCGAC"  
/annotation\_group="GTCGAC"  
/label="SallI"  
/note="Geneious type: restriction site"

misc\_feature 4819..4824  
/Recognition\_pattern="CTGCA^G"  
/annotation\_group="CTGCAG"  
/label="PstI"  
/note="Geneious type: restriction site"

```

misc_feature          4831..4836
/Recognition_pattern="A^AGCTT"
/annotation_group="AAGCTT"
/label="HindIII"
/note="Geneious type: restriction site"
-10_signal            complement(4898..4903)
/note="Plac promoter (drives lacZalpha;
counter-clockwise); TATGTT"
/label="-10 signal"
-35_signal            complement(4922..4927)
/note="Plac promoter (drives lacZalpha;
counter-clockwise); TTTACA"
/label="-35 signal"
protein_bind          complement(4947..4959)
/note="CAP protein binding site"
/bound_moiety="catabolite activator protein (CAP)"
/label="CAP protein binding site protein bind"
rep_origin            complement(5251..5839)
/note="pMB1 origin of replication (counter-clockwise)
(RNAII -35 to RNA/DNA switch point)"
/label="rep origin"
misc_RNA              complement(5251..5803)
/note="RNAII transcript (complementary strand)"
/label="RNA"
-35_signal            5657..5662
/note="RNAI promoter (clockwise); TTGAAG"
/label="RNAI promoter (clockwise); TTGAAG -35 signal"
-10_signal            5679..5684
/note="RNAI promoter (clockwise); GCTACA"
/label="RNAI promoter (clockwise); GCTACA -10 signal"
misc_RNA              5693..5800
/note="RNAI transcript"
/label="RNAI transcript"
-10_signal            complement(5813..5818)
/note="RNAII promoter (counter-clockwise); CGTAAT"
/label="-10 signal"
-35_signal            complement(5834..5839)
/note="RNAII promoter (counter-clockwise); TTGAGA"
/label="-35 signal"
CDS                   complement(6010..6870)
/gene="bla"
/note="ampR (confers resistance to ampicillin)"
  
```



```

      410      420      430      440
|||||
cgagctcggtaatttaaatttttcaggcgcacacccatcg 440
tgaagggtgtggcgctgaagagcagggagaaggccgcat 480
cctcagtagacgggaacggagagacgcgacgaggcgca 520
aaagtaaagttgcagcactttccattgatttgaaaccgct 560
ccggaagttgataagcaaggtaaagtagagtttccgcctt 600

      610      620      630      640
|||||
ctccgaagccatttccttgcattttgactcacgatatgtg 640
aggcaagacgagacagactggtcgaacgcgattgtcgcgc 680
ttcaagaggcgactacgcgttcacgggcttcacacagcca 720
tggaggagaggggaagtgcctggtgaagcagaaacagaaga 760
gatctcacaggttcaaagatgtgagaaatatttgacgaa 800

      810      820      830      840
|||||
actaaaactagctgggagaggtggcaactctggactggag 840
ggaggaggggaggaacgacttggaggccggggtggtccg 880
acaagacagtgtgtgccaaagtaacggcagtttctgaaaag 920
aacaacagtttgctccgccactgccacgagagtcaccct 960
acgagatttgccgtggcaacacaacaccagcacgggctat 1000

     1010     1020     1030     1040
|||||
caccaccaactgttctgtgtggagcttcagcttccaccga 1040
caaagtgaggaaacagatccggtagccgcattgtcacccg 1080
tgattcgcatgcaaagacaagatgccactaacaggggttc 1120
aacaaggcggttgctgggtcggctgtcctctgttacgcat 1160
tttttggagaacgaagtggctcgaaaacaagtttcacag 1200

     1210     1220     1230     1240
|||||
agcatttcaactctgatatgaaagcaaattattcgaattt 1240
gccgggggatattggacgcgttctaaccacgactgcact 1280
atctagtagcccgatcgcgcgcccaacgctgtcaccact 1320
tctactttacggtaaccattagcatgtgtttttcttccg 1360
gtccctgaacgagaaagcaactcgaaggaaagtactgag 1400

     1410     1420     1430     1440
|||||
cctaagaaccttctgggatacgaacttagcagcaggagag 1440
acaagtttttgctttgcctcgggaagttcctttacaaaag 1480
gacgaacatcttttggtcagatgaggcactgccttcagc 1520
ggaaaccgcgataaaaatagttggtgctacacgttgagcgc 1560
actttccttccaaacatttcaactcaggaatccagtcgtg 1600

     1610     1620     1630     1640
|||||
tttcctggaggcacactagacctgtagtagctttttgtct 1640
cgcgcttaatgggaaattcttcccagtggcgaattcctg 1680
tgccagtggtaccttgatcagcacgaaaccttgattcaa 1720
acccgcccgcggaagatccgatcttgctgctgttcgcagt 1760
cccagtagcgtcctgtcggccgcgcctctctgttggtgg 1800

```

```
      1810      1820      1830      1840
|||||
gcagccgctacacctgttatctgactgccgtgcgcgaaaa 1840
tgacgccatttttgggaaaatcggggaacttcattcctta 1880
aaagtatgcggagggttctctttcttctgttcgtttctt 1920
tttctcggggttgataaccgtgttcgatgtaagcactttc 1960
cgtctctcctccgtgctttgttcgacatcgagaccaggtg 2000

      2010      2020      2030      2040
|||||
tgcagatccttcgcttgatccggagacgcgtgtctcg 2040
tagaaccttttcattttaccacacggcagtgcgagcact 2080
gctctgagtgagcagggacgggtgaagtttcgcttagt 2120
agtgcgtttctgctctacggggcgttgatcagatccagca 2160
aatggcgtccaaaccattgaagactacggcaagggcaag 2200

      2210      2220      2230      2240
|||||
ggccgtattgagcccatgtatatccccgacaacaccttct 2240
acaacgctgatgactttcttggtgccccccactgcaagcc 2280
ctacattgacaaaatcctcctcctgggtggattggtcaag 2320
gacagagttgagaagttggcgtatgacatccacagaactt 2360
acttcggcgaggagttgcacatcatttgcatcctgaaagg 2400

      2410      2420      2430      2440
|||||
ctctcgcggcttcttcaaccttctgatcgactaccttgcc 2440
accatacagaagtacagtggtcgtgagtcagcgtgcccc 2480
ccttcttcgagcactatgtccgcctgaagtcctaccagaa 2520
cgacaacagcacaggccagctcaccgtcttgagcgacgac 2560
ttgtcaatctttcgcgacaagcacgcttctgattggtgagg 2600

      2610      2620      2630      2640
|||||
acatcgtcgacaccggtttcacctcaccgagttcgggtga 2640
gcgccctgaaagccgctcgggtcccaagtcgatgagaatcgcc 2680
accctcgtcgagaagcgcacagatcgctccaacagcttga 2720
agggcgacttcgctcggcttcagcattgaagacgtctggat 2760
cgttggttgctgctacgacttcaacgagatggtccgcgac 2800

      2810      2820      2830      2840
|||||
ttcgaccacgtcgccgtcctgagcgacgccgctcgcaaaa 2840
agttcgagaagtaaaccctgcatagccctacagaagctgc 2880
ccgtctctcgttttctctcttttcggagggatcagggag 2920
agtgcctcgggtcggagagagctgacgaggggggtgccaga 2960
gaccctgtgtcctttatcgaagaaaagggatgactcttc 3000

      3010      3020      3030      3040
|||||
atgtggcatttcacacagctctcacctcgccttgtttctt 3040
tttgtcaatcagaacgaaagcgagttgcgggtgacgcaga 3080
tgtgcgtgtatccactcgtgaatgcgttatcgttctgtat 3120
gccgctagagtgctggactgttgctgtctgcccacgacag 3160
cagacaactttccttctatgcacttgcaggatggtgcagc 3200
```

```

      3210      3220      3230      3240
|||||
gcaaacgacggagagaaaggagcaccctctcagtttcct 3240
acgatgtgctgtcagtttcgactcttcaccgcgaacgatt 3280
ggcgatacgtctctgttgacttgtaggctccgaccacga 3320
agctcccttaactaaataagccgcgacacctaagtgtaca 3360
ccatttgagatcgataatctgcgaccgctgaatccgtcc 3400
      3410      3420      3430      3440
|||||
agatcaggaaaaccgcaccacctaagtgtaaaccttgttt 3440
aggtcgataaaatgctaccaacccccaccacaatcgagc 3480
cttgagcgtttctgcgcacgcggtggcctacgtgacttgc 3520
tgatgcctgcctctggccattcatgccagtcagtgcgcat 3560
aaaaatgtggacacagtcggttgacaagtgttctggcagg 3600
      3610      3620      3630      3640
|||||
ctacagtgacaccgcggtggaggtaccaacggggagcgtt 3640
ccttctctgaagggttctagtcacgccgactgcttgcta 3680
acaccgatcctcattatggcctcctgtgacaatcaggcta 3720
ctgccatccaccttacctttcgcggctggtcttcagcgaa 3760
actaacacaaggacgagagaagacgcgggctcgtcccaca 3800
      3810      3820      3830      3840
|||||
ccctcacctgcggctatgaacctgacacggctgcgtcagg 3840
aaaactgcacacgacaccccatgaacactttgtgtactgt 3880
cactatgtcctttattctacataaggagggtcacaggaga 3920
gcctcacgtgtctctcggcgacatcagcgaccgtataaaa 3960
ctgcgagagcggcttgggtgcaaatcatttcaatggtttc 4000
      4010      4020      4030      4040
|||||
tggacaacgtttgccccgaatccgatgtccgaagcctccg 4040
tgaggatgtgcctttcatgggtacgacttgaaaaacatg 4080
ggacactggataagtagatgtttccctaggaaggccaagc 4120
atagctacaaggctgcacagacgactaaggtaatgcaaaa 4160
caagcggcgtgtgatttcttttggttgagatccgtgagc 4200
      4210      4220      4230      4240
|||||
atcgtcactgctaccgtgcgcccactttgcttcgtttcaa 4240
caattcgtgvcgagcctccacatattctaggtctattttg 4280
gattctaaaaaacactggcgggtgtgacgttgggttcaccg 4320
ttgcagagtacggggttcgggtgtgggttcgtggtactca 4360
gattcctcggcatcgaatccactcctgtgtgagaaacac 4400
      4410      4420      4430      4440
|||||
tcaccaggcagccatggagtcacacgcaacagctcccta 4440
acagtcgtcactggacatgagcaacttcatccctgacgag 4480
aacataaattttcccttttagtgtttctttgcaggttccc 4520
caccaccaggaaatgcttttcgtacgcacacacgaaagac 4560
agaaggcgcagatgatgctctactttcctgtgtgtctag 4600

```



4610 4620 4630 4640  
ccgtctacttcttcaggcccgcctcctcctgagagagaacg 4640  
catttctgtgcctcgacggtggccatcctcatccgggagg 4680  
acaaacagcagatattacgaatgcatgcggtcgtgcagga 4720  
accctattcatgtattttgttcgaacaatgcaagtcaaga 4760  
tggcccgaaacgacgaagcttgcttgaacggcattttaat 4800

4810 4820 4830 4840  
ggatcctctagagtcgacctgcaggcatgcaagcttggcg 4840  
taatcatggctcatagctgtttcctgtgtgaaattgttattc 4880  
cgctcacaattccacacaacatacgagccggaagcataaa 4920  
gtgtaaagcctgggggtgcctaataatgagtgagctaactcaca 4960  
ttaattgcgttgcgctcactgcccgctttccagtcgggaa 5000

5010 5020 5030 5040  
acctgtcgtgccagctgcattaatgaatcggccaacgcgc 5040  
ggggagaggcggtttgcgtattgggcgctcttccgcttcc 5080  
tcgctcactgactcgctgcgctcggctcgttcggctgcggc 5120  
gagcgggtatcagctcactcaaaggcggtaatacggttattc 5160  
cacagaatcaggggataacgcaggaaagaacatgtgagca 5200

5210 5220 5230 5240  
aaaggccagcaaaaaggccaggaaccgtaaaaaggccgcgt 5240  
tgctggcggttttccataggctccgccccctgacgagca 5280  
tcacaaaaatcgacgctcaagtcaaggtggcgaaaccg 5320  
acaggactataaagataaccaggcgtttccccctggaagct 5360  
ccctcgtgcgctctcctgttccgaccctgcccgttaccgg 5400

5410 5420 5430 5440  
atacctgtccgcctttctcccttcgggaagcgtggcgctt 5440  
tctcatagctcacgctgtaggtatctcagttcgggtgtagg 5480  
tcgttcgctccaagctgggctgtgtgcacgaacccccctg 5520  
tcagcccgaccgctgcgccttatccggtaactatcgtctt 5560  
gagtccaaccggtgaagacacgacttatcgccactggcag 5600

5610 5620 5630 5640  
cagccactggtaacaggattagcagagcgaggatgtagg 5640  
cggtgctacagagttcttgaagtggcctaactacggc 5680  
tactactagaagaacagtatgttggtatctgcgctctgctga 5720  
agccagttaccttcggaaaaagagttggtagctcttgatc 5760  
cggcaaacaccaccgctggttagcggtaggtttttttgtt 5800

5810 5820 5830 5840  
tgcaagcagcagattacgcgcagaaaaaaaggatctcaag 5840  
aaagatcctttgatctttctacggggtctgacgctcagtg 5880  
gaacgaaaactcacgttaagggattttgggtcatgagatta 5920  
tcaaaaaggatcttcacctagatccttttaaatataaaat 5960  
gaagttttaatcaatctaaagtatatatgagtaaacttg 6000

```

      6010      6020      6030      6040
|||||
gtctgacagttaccaatgcttaatcagtgaggcacctatc 6040
tcagcgatctgtctatcttgcgttcacatagttgcctgac 6080
tccccgctcgtgtagataactacgatacgggagggcttacc 6120
atctggcccccagtgctgcaatgataccgcgagaccacgc 6160
tcaccggctccagatttatcagcaataaaccagccagccg 6200

      6210      6220      6230      6240
|||||
gaagggccgagcgcagaagtggcctgcaactttatccgc 6240
ctccatccagtcatttaattggtgcccgggaagctagagta 6280
agtagttcgccagttaatagtttgcgcaacgttggtgcca 6320
ttgctacaggcatcgtggtgacgctcgtcgtttggtat 6360
ggcttcattcagctccgggttcccaacgatcaaggcgagtt 6400

      6410      6420      6430      6440
|||||
acatgatcccccatggttgcaaaaaagcggtagctcct 6440
tcggtcctccgatcgttgtcagaagtaagttggccgcagt 6480
gttatcactcatggttatggcagcactgcataattctctt 6520
actgtcatgccatccgtaagatgcttttctgtgactgggtg 6560
agtactcaaccaagtcattctgagaatagtgtatgcggcg 6600

      6610      6620      6630      6640
|||||
accgagttgctccttgcccggcgtcaatacgggataatacc 6640
gcgccacatagcagaactttaaaagtgctcatcattggaa 6680
aacgttcttcggggcgaaaactctcaaggatcttaccgct 6720
ggttgagatccagttcgatgtaaccactcgtgcacccaac 6760
tgatcttcagcatctttactttcaccagcgtttctgggt 6800

      6810      6820      6830      6840
|||||
gagcaaaaacaggaaggcaaaatgccgcaaaaagggaat 6840
aaagggcgacacggaaatggtgaatactcatactcttcctt 6880
tttcaatattattgaagcatttatcagggttattgtctca 6920
tgagcggatacatatttgaatgtatttagaaaaataaaca 6960
aataggggttccgcgcacatttccccgaaaagtgccacct 7000

      7010      7020      7030      7040
|||||
gacgtctaagaaaccattattatcatgacattaacctata 7040
aaaatagggctatcacgaggccctttcgtc 7070
```

LOCUS pUC19\_T5KO\_vecto 7084 bp DNA

circular UNA 17-DEC-2012

DEFINITION Concatenation of 5 sequences.

ACCESSION urn.local...1317878330916.46

VERSION urn.local...1317878330916.46

KEYWORDS .

SOURCE  
ORGANISM

.

ORIGIN

Features

source

1..415

/organism="Cloning vector pUC19"

/mol\_type="other DNA"

/label="source Cloning vector pUC19"

misc\_feature 1..419

/label="pUC19 5' (concatenated sequence 1)"

/note="Geneious type: Concatenated sequence"

CDS complement(146..415)

/gene="lacZalpha"

/codon\_start=1

/product="beta-galactosidase alpha fragment"

/translation="MTMITPSLHACRSTLEDPRVPSSNSLAVVLQRRDWNPGVTQLNRLAAHPPFASWRNSEEARTDRPSQQLRSLNGEWRLMRYFLLTHLCGISHP  
STICSDAA"

/label="lacZalpha CDS"

gene complement(146..415)

/gene="lacZalpha"

/label="lacZalpha gene"

misc\_feature 183..188

/Recognition\_pattern="CA^TATG"

/annotation\_group="CATATG"

/label="NdeI"

/note="Geneious type: restriction site"

misc\_feature 245..255

/Recognition\_pattern="GCCNNNN^NGGC"

/annotation\_group="GCCNNNNNGGC"

/label="BglI"

/note="Geneious type: restriction site"

misc\_feature complement(391..415)

/created\_by="User"

/label="pUC19productionR-Smi"

/note="Geneious type: primer\_bind\_reverse"

misc\_feature 396..415

/gene="lacZalpha"

/note="multiple cloning site (EcoRI-HindIII)"

/label="lacZalpha misc"

misc\_feature 396..401

/Recognition\_pattern="G^AATTC"

/annotation\_group="GAATTC"

/note="Geneious type: primer\_bind\_reverse"

misc\_feature 396..415

/gene="lacZalpha"

/note="multiple cloning site (EcoRI-HindIII)"

/label="lacZalpha misc"

misc\_feature 396..401

/Recognition\_pattern="G^AATTC"

/annotation\_group="GAATTC"

/label="EcoRI"

/note="Geneious type: restriction site"

primer\_bind 401..440

/created\_by="User"

/modified\_by="User"

/label="T5ko-5'F w/adp"

misc\_feature 402..407

/Recognition\_pattern="GAGCT^C"

/annotation\_group="GAGCTC"

/label="SacI"

/note="Geneious type: restriction site"

misc\_feature 412..415

/created\_by="User"

/modified\_by="User"

/label="SmiI5"

/note="Geneious type: restriction\_site"

misc\_feature 416..419

/Original\_Bases

/label

/note="Geneious type: Editing History Insertion"

misc\_feature 416..419

/created\_by="User"

/label="Smi3"

/note="Geneious type: restriction\_site"

misc\_recomb 420..1648

/created\_by="User"

/label="5'Recomb"

misc\_feature 420..1648

/label="T5ko - 5'Recomb (concatenated sequence 2)"

/note="Geneious type: Concatenated sequence"

primer\_bind 420..440

/created\_by="User"

/label="T5ko-5'F"

gene 420..805

/Source="annotation"  
/Note="multiprotein bridging factor type 1, putative"  
/soTerm="protein\_coding"  
/product="multiprotein bridging factor type 1, putative"  
/taxon="Toxoplasma gondii ME49"  
/isDeprecated=0  
/isPseudo=0  
/label="TGME49\_078530"

UTR 420..805

/Source="annotation"  
/isDeprecated=0  
/label="UTR"

misc\_feature complement(1628..1663)

/created\_by="User"  
/label="T5ko-5'R w/adp"  
/note="Geneious type: primer\_bind\_reverse"

misc\_feature complement(1628..1648)

/created\_by="User"  
/label="T5ko-5'R"  
/note="Geneious type: primer\_bind\_reverse"

misc\_feature 1649..3588

/label="HXGPRT w/ KpnI (concatenated sequence 3)"  
/note="Geneious type: Concatenated sequence"

misc\_feature 1649..1654

/created\_by="User"  
/label="KpnI"  
/note="Geneious type: restriction\_site"

primer\_bind 1649..1675

/created\_by="User"  
/label="HXGPRT-KpnIF"

gene 1655..3584

/created\_by="User"  
/label="DHFR-HXGPRT"

misc\_feature complement(1868..1890)

/created\_by="User"  
/label="5ex2R"  
/note="Geneious type: primer\_bind\_reverse"

misc\_feature 2117..2119

/Original\_Bases  
/label  
/note="Geneious type: Editing History Insertion"

Selectable\_Mark 2123..2815

|                                                    |                        |
|----------------------------------------------------|------------------------|
| /label="HXGPRT"                                    |                        |
| primer                                             | 2130..2149             |
| /note="Oligo predicted by CLC primer designer"     |                        |
| /note="Oligo type: primer"                         |                        |
| /note="Melting temp.: 56.07"                       |                        |
| /label="HXGPRT detection"                          |                        |
| primer                                             | complement(2845..2866) |
| /note="Oligo predicted by CLC primer designer"     |                        |
| /note="Oligo type: primer"                         |                        |
| /note="Melting temp.: 54.02"                       |                        |
| /label="HXGPRT detection"                          |                        |
| primer_bind                                        | 3407..3429             |
| /created_by="User"                                 |                        |
| /label="3exF"                                      |                        |
| misc_feature                                       | complement(3568..3588) |
| /created_by="User"                                 |                        |
| /label="HXGPRT-KpnIR"                              |                        |
| /note="Geneious type: primer_bind_reverse"         |                        |
| primer_bind                                        | 3574..3609             |
| /created_by="User"                                 |                        |
| /label="T5ko-3'F w/adp"                            |                        |
| misc_feature                                       | 3583..3588             |
| /created_by="User"                                 |                        |
| /modified_by="User"                                |                        |
| /label="KpnI"                                      |                        |
| /note="Geneious type: restriction_site"            |                        |
| misc_recomb                                        | 3589..4806             |
| /created_by="User"                                 |                        |
| /label="3'Recomb"                                  |                        |
| misc_feature                                       | 3589..4806             |
| /label="T5ko - 3'Recomb (concatenated sequence 4)" |                        |
| /note="Geneious type: Concatenated sequence"       |                        |
| primer_bind                                        | 3589..3609             |
| /created_by="User"                                 |                        |
| /label="T5ko-3'F"                                  |                        |
| UTR                                                | 4327..4806             |
| /Source="annotation"                               |                        |
| /isDeprecated=0                                    |                        |
| /label="UTR"                                       |                        |
| gene                                               | 4327..4806             |
| /Source="annotation"                               |                        |
| /Note="protein phosphatase 2C, putative"           |                        |

/soTerm="protein\_coding"  
 /product="protein phosphatase 2C, putative"  
 /taxon="Toxoplasma gondii ME49"  
 /isDeprecated=0  
 /isPseudo=0  
 /label="TGME49\_078510"

misc\_feature complement(4786..4825)  
 /created\_by="User"  
 /label="T5ko-3'R w/adp"  
 /note="Geneious type: primer\_bind\_reverse"

misc\_feature complement(4786..4806)  
 /created\_by="User"  
 /label="T5ko-3'R"  
 /note="Geneious type: primer\_bind\_reverse"

misc\_feature 4807..4810  
 /Original\_Bases  
 /label  
 /note="Geneious type: Editing History Insertion"

misc\_feature 4807..7084  
 /label="pUC19 3' (concatenated sequence 5)"  
 /note="Geneious type: Concatenated sequence"

misc\_feature 4807..4810  
 /created\_by="User"  
 /label="Smi5"  
 /note="Geneious type: restriction\_site"

misc\_feature 4811..4850  
 /gene="lacZalpha"  
 /note="multiple cloning site (EcoRI-HindIII)"  
 /label="lacZalpha misc"

source 4811..7084  
 /organism="Cloning vector pUC19"  
 /mol\_type="other DNA"  
 /label="source Cloning vector pUC19"

CDS complement(4811..4867)  
 /gene="lacZalpha"  
 /codon\_start=1  
 /product="beta-galactosidase alpha fragment"  
 /translation="MTMITPSLHACRSTLEDPRVPSSNSLAVVLQRRDWENPGVTQLNRLAAHPPFASWRNSEEARTD  
 RPSQQLRSLNGEWRLMRYFLLTHLCGISHRIWCTLSTICSDAA"  
 /label="lacZalpha CDS"

gene complement(4811..4867)  
 /gene="lacZalpha"

---

/label="lacZalpha gene"

---

misc\_feature 4811..4814  
/created\_by="User"  
/modified\_by="User"  
/label="SmiI3"  
/note="Geneious type: restriction\_site"

---

primer\_bind 4811..4836  
/created\_by="User"  
/label="pUC19productionF-Smi"

---

misc\_feature 4815..4820  
/Recognition\_pattern="G^GATCC"  
/annotation\_group="GGATCC"  
/label="BamHI"  
/note="Geneious type: restriction site"

---

misc\_feature 4821..4826  
/Recognition\_pattern="T^CTAGA"  
/annotation\_group="TCTAGA"  
/label="XbaI"  
/note="Geneious type: restriction site"

---

misc\_feature 4827..4832  
/Recognition\_pattern="G^TCGAC"  
/annotation\_group="GTCGAC"  
/label="SalI"  
/note="Geneious type: restriction site"

---

misc\_feature 4833..4838  
/Recognition\_pattern="CTGCA^G"  
/annotation\_group="CTGCAG"  
/label="PstI"  
/note="Geneious type: restriction site"

---

misc\_feature 4845..4850  
/Recognition\_pattern="A^AGCTT"  
/annotation\_group="AAGCTT"  
/label="HindIII"  
/note="Geneious type: restriction site"

---

-10\_signal complement(4912..4917)  
/note="Plac promoter (drives lacZalpha;  
counter-clockwise); TATGTT"  
/label="-10 signal"

---

-35\_signal complement(4936..4941)  
/note="Plac promoter (drives lacZalpha;  
counter-clockwise); TTTACA"  
/label="-35 signal"

---



|                                                                                                                                                                                                                                                                                                                             |                        |
|-----------------------------------------------------------------------------------------------------------------------------------------------------------------------------------------------------------------------------------------------------------------------------------------------------------------------------|------------------------|
| protein_bind                                                                                                                                                                                                                                                                                                                | complement(4961..4973) |
| /note="CAP protein binding site"                                                                                                                                                                                                                                                                                            |                        |
| /bound_moiety="catabolite activator protein (CAP)"                                                                                                                                                                                                                                                                          |                        |
| /label="CAP protein binding site protein bind"                                                                                                                                                                                                                                                                              |                        |
| rep_origin                                                                                                                                                                                                                                                                                                                  | complement(5265..5853) |
| /note="pMB1 origin of replication (counter-clockwise)<br>(RNAII -35 to RNA/DNA switch point)"                                                                                                                                                                                                                               |                        |
| /label="rep origin"                                                                                                                                                                                                                                                                                                         |                        |
| misc_RNA                                                                                                                                                                                                                                                                                                                    | complement(5265..5817) |
| /note="RNAII transcript (complementary strand)"                                                                                                                                                                                                                                                                             |                        |
| /label="RNA"                                                                                                                                                                                                                                                                                                                |                        |
| -35_signal                                                                                                                                                                                                                                                                                                                  | 5671..5676             |
| /note="RNAI promoter (clockwise); TTGAAG"                                                                                                                                                                                                                                                                                   |                        |
| /label="RNAI promoter (clockwise); TTGAAG -35 signal"                                                                                                                                                                                                                                                                       |                        |
| -10_signal                                                                                                                                                                                                                                                                                                                  | 5693..5698             |
| /note="RNAI promoter (clockwise); GCTACA"                                                                                                                                                                                                                                                                                   |                        |
| /label="RNAI promoter (clockwise); GCTACA -10 signal"                                                                                                                                                                                                                                                                       |                        |
| misc_RNA                                                                                                                                                                                                                                                                                                                    | 5707..5814             |
| /note="RNAI transcript"                                                                                                                                                                                                                                                                                                     |                        |
| /label="RNAI transcript"                                                                                                                                                                                                                                                                                                    |                        |
| -10_signal                                                                                                                                                                                                                                                                                                                  | complement(5827..5832) |
| /note="RNAII promoter (counter-clockwise); CGTAAT"                                                                                                                                                                                                                                                                          |                        |
| /label="-10 signal"                                                                                                                                                                                                                                                                                                         |                        |
| -35_signal                                                                                                                                                                                                                                                                                                                  | complement(5848..5853) |
| /note="RNAII promoter (counter-clockwise); TTGAGA"                                                                                                                                                                                                                                                                          |                        |
| /label="-35 signal"                                                                                                                                                                                                                                                                                                         |                        |
| CDS                                                                                                                                                                                                                                                                                                                         | complement(6024..6884) |
| /gene="bla"                                                                                                                                                                                                                                                                                                                 |                        |
| /note="ampR (confers resistance to ampicillin)"                                                                                                                                                                                                                                                                             |                        |
| /codon_start=1                                                                                                                                                                                                                                                                                                              |                        |
| /product="beta-lactamase"                                                                                                                                                                                                                                                                                                   |                        |
| /translation="MSIQHFRVALIPFFAAFCPLPVFAHPETLVKVKDAEDQLGARVGYIELDLNSGKILESFRPEERF<br>PMMSTFKVLLCGAVLSRIDAGQEQLGRRIHYSQNDLVEYSPVTEKHLTDGMTVRELCSAAITMSDNTAANLLLLTTIGG<br>PKELTAFLNMGDHSVTRLDRWEPELNEAIPNDERDTTMPVAMATTLRKLTTGELLTLASRQQLIDWMEADKVAGPLL<br>RSALPAGWFIADKSGAGERGSRGIIAALGPDGKPSRIVVIYTTGSQATMDERNRQIAEIGASLIKHW" |                        |
| /label="bla CDS"                                                                                                                                                                                                                                                                                                            |                        |
| gene                                                                                                                                                                                                                                                                                                                        | complement(6024..6884) |
| /gene="bla"                                                                                                                                                                                                                                                                                                                 |                        |
| /label="bla gene"                                                                                                                                                                                                                                                                                                           |                        |
| misc_feature                                                                                                                                                                                                                                                                                                                | 6211..6221             |
| /Recognition_pattern="GCCNNNN^NGGC"                                                                                                                                                                                                                                                                                         |                        |
| /annotation_group="GCCNNNNNGGC"                                                                                                                                                                                                                                                                                             |                        |

/label="BglI"  
/note="Geneious type: restriction site"  
sig\_peptide complement(6816..6884)  
/gene="bla"  
/note="required for secretion to the periplasm; cleaved off to form the mature beta-lactamase protein."  
/label="bla signal peptide"  
-10\_signal complement(6928..6933)  
/note="bla promoter (counter-clockwise); GAGACA"  
/label="-10 signal"  
-35\_signal complement(6949..6954)  
/note="bla promoter (counter-clockwise); TTCAA"  
/label="-35 signal"

```

      10      20      30      40
┌──────────┬──────────┬──────────┬──────────┐
tcgcgcggttccggtgatgacggtgaaaacctctgacacat 40
gcagctcccggagacggtcacagcttgtctgtaagcggat 80
gccgggagcagacaagcccgtcagggcgcgctcagcgggtg 120
ttggcgggtgtcggggctggcttaactatgcggcatcaga 160
gcagattgtactgagagtgaccatatgcgggtgtgaaata 200
      210      220      230      240
┌──────────┬──────────┬──────────┬──────────┐
ccgcacagatgcgtaaggagaaaataaccgcatcaggcgc 240
attcgccattcaggctgcgcaactgttgggaagggcgatc 280
gggtgcggcctcttcgctattacgccagctggcgaaaggg 320
ggatgtgctgcaaggcgattaagtgggtaacgccagggt 360
tttcccagtcacgacgttgtaaaacgacggccagtgaatt 400
      410      420      430      440
┌──────────┬──────────┬──────────┬──────────┐
cgagctcggtaatttaaattgcggttcatccacgcagaga 440
caccggctcttgggaggacggtgttttcgccgttttcgct 480
ggtttccattcatttgtcgacaatgtgtttcgaccgcat 520
tcaccgataccatttgtgcatggagcaaagcgactaggcg 560
cctccgcgctctccagagaaccttgtgtgtagtgatcgtga 600
      610      620      630      640
┌──────────┬──────────┬──────────┬──────────┐
acacagaggttcggtttccagctgtccgacatctggtggg 640
tgactgacttcatgctgtgcaataatgattcagcgacat 680
agtgttgggttcgctggtaacatctaagtccttcattgtg 720
cggaaaatattcatatcgcgctcggcatgacacgtccagaa 760
caaggtgcatacatgcgagactgacacagaagaattttgca 800
      810      820      830      840
┌──────────┬──────────┬──────────┬──────────┐
gatcgattccttgtcgacacacggcaggcactgcatacct 840
cgagacgatggcactgagaagcgcctcttgggatcacgga 880
aaaagtccctagtgagatagaccgtctgcgactgtgggtg 920
tcccttcatgctacgcgacctgcgtcacaacgcttcagg 960
aatactggtggcctgagtcgaagaccgtcactgtactgga 1000
```

1010 1020 1030 1040  
tatagagaggctgagcaaattatttgcgtgcataacagcc 1040  
tgacgatggtttattgcagtatatctgcggtcgctggtca 1080  
gcccagacatttgtataggaagtcctttatcaggctggaa 1120  
cgcttttctggttttcgtcatccgtgaccggaccgggcag 1160  
ctgaacagggagtgaaagaattttatggcagattatcctt 1200

1210 1220 1230 1240  
cagatctacctaccttgtccacactgtcatgaaagccgac 1240  
gtcgtcagcattttactagttcatatccgatcgcttggtta 1280  
gctgaggggttgaaatgtgtgcatttagactatacaaac 1320  
agtttgccgtgttcgtccactctcaatactggaaacggat 1360  
agtggtcggatttcatgtgtcattcgtacttgtaacacat 1400

1410 1420 1430 1440  
cggaataaaattagtcgattcatgctccaggacattatc 1440  
ggagctcttcaaaggggctggcccacacgctgcctcagcc 1480  
ccacatgtggaagacgttcatttttcgagtatttcgttga 1520  
ggcggaaagcgagtcgcccccacaccgcttgctgaaaaga 1560  
ggcctgcccggagttgtcatcgctatcgaggaactccgata 1600

1610 1620 1630 1640  
tcgttggtatccgcccttattctcttcaccccactcaaca 1640  
cagctggaggtaccttgatcagcacgaaaccttgattca 1680  
aaaccgcccgcggaagatccgatcttgctgctgttcgcag 1720  
tcccagtagcgtcctgtcggccgcgccgtctctggttggtg 1760  
ggcagccgctacacctgttatctgactgccgtgctgcgaaa 1800

1810 1820 1830 1840  
atgacgccatttttgggaaaatcggggaacttcattcttt 1840  
aaaagtatgaggaggtttcctttttcttctggttcgtttct 1880  
ttttctcgggttgataaccgtgttcgatgtaagcacttt 1920  
ccgtctctcctccgtgctttgttcgacatcgagaccaggt 1960  
gtgcagatccttcgcttgctgatccggagacgcgtgtctc 2000

2010 2020 2030 2040  
gtagaaccttttcattttaccacacggcagtgaggagcac 2040  
tgctctgagtgacagcaggacgggtgaagtttcgcttttag 2080  
tagtgcgtttctgctctacggggcggttgatcagatccagca 2120  
aaatggcgtccaaaccattgaagactacggcaagggcaa 2160  
gggccgtattgagcccatgtatatccccgacaacaccttc 2200

2210 2220 2230 2240  
tacaacgctgatgactttcttgtgccccccactgcaagc 2240  
cctacattgacaaaatcctcctcctgggtggattggtcaa 2280  
ggacagagttgagaagttggcgatgatccacagaact 2320  
tacttcggcgaggagttgcacatcatttgcacctgaaag 2360  
gctctcgcggcttcttcaaccttctgatcgactaccttgc 2400

2410 2420 2430 2440  
caccatacagaagtacagtggctcgtgagtccagcgtgcc 2440  
cccttcttcgagcactatgtccgcctgaagtcctaccaga 2480  
acgacaacagcacaggccagctcaccgctcttgagcgacga 2520  
cttgtcaatctttcgcgacaagcacgcttctgattggtgag 2560  
gacatcgtcgcacaccggtttcaccctcaccgagttcgggtg 2600  
2610 2620 2630 2640  
agcgcctgaaagccgctcgggtcccaagtcgatgagaatcgc 2640  
caccctcgtcgcagaagcgcacagatcgctccaacagcttg 2680  
aaagggcgacttcgctcggcttcagcattgaagacgtctgga 2720  
tcgttgggtgctgctacgacttcaacgagatggtccgcga 2760  
cttcgaccacgctcggcgtcctgagcgacgcccgtcgcgaaa 2800  
2810 2820 2830 2840  
aaagttcgagaagtaaaccctgcatagccctacagaagctg 2840  
cccgtctctcgttttctctcttttcggagggatcagggga 2880  
gagtgccctcgggtcggagagagctgacgaggggggtgccag 2920  
agaccctctgtgtcctttatcgaagaaaagggatgactctt 2960  
catgtggcatttcacacagtctcacctcgccttgttttct 3000  
3010 3020 3030 3040  
ttttgtcaatcagaacgaaagcgagttgcgggtgacgcag 3040  
atgtgcgtgtatccactcgtgaatgcggttatcgttctgta 3080  
tgccgctagagtgctggactggtgctgtctgccacgaca 3120  
gcagacaactttccttctatgcacttgcaggatggtgcag 3160  
cgaaaacgacggagagaaaggagcaccctctcagtttccc 3200  
3210 3220 3230 3240  
tacgatgtgctgtcagtttcgactcttcaccgcgaacgat 3240  
tggcgatacgtctctggtgacttggttaggctccgaccacg 3280  
aaagctcccttaactaaataagccgcgacacctaagtgtac 3320  
accatttgagatcgataatctgcgaccgctgaatccgtc 3360  
cagatcaggaaaaccgcaccacctaagtgtaaaccttggt 3400  
3410 3420 3430 3440  
taggtcgataaaaatgctaccaacccccaccacaatcgag 3440  
ccttgagcgtttctgcgcacgcgcttggcctacgtgacttg 3480  
ctgatgcctgectctggccattcatgccagtcagtgcgca 3520  
taaaaatgtggacacagtcgggttgacaagtgttctggcag 3560  
gctacagtgacaccgcggtggaggtaccaatttgggcttt 3600  
3610 3620 3630 3640  
cctgcgggctatgaaaggataattcccacgttttactatg 3640  
gagaaaagtatgcaaacagccatccggtcattgtacatct 3680  
gggtgtagcagaggttgaagaacaaaagcaacactataccg 3720  
tacaggggattgctgtagccatgctcagacattcccttgt 3760  
ctccgctatgtctctttctcttcatctacttctctaactg 3800

```
      3810      3820      3830      3840
|||||
aaaccatcaagagttgcctgccacctctgttacaggattt 3840
gccaagtgcaacgggaatgttttgatttgccatttgcttt 3880
ctctaacaggaacacaggtcaaattatgttggacgcaaaa 3920
acaattagcgggtgacgcgctttgcatcggctatccggatc 3960
gcgttttcttgtgcgaggacgagaaaacggacgagaaaattt 4000

      4010      4020      4030      4040
|||||
ctctgtggaaattcgtcagaacggcttggtagtttggacc 4040
gattccccggaaacaagacaggctaaagcttgcttgacgc 4080
tagtcgacgcccacaagttttcaagtccttctcaggtacg 4120
tggcataacaaaacgaattttaaaacgaaggagaaaagctg 4160
tggggtatgcatagcgtgagaaaagagcgagagctcctaaa 4200

      4210      4220      4230      4240
|||||
agtagttgaatccgactgccagagaagagccgtgagacac 4240
gcgcgaggggacgggcatctggaaccggtgaaataagtgtc 4280
acaagcacgcaggaagttttctcgtagctcatgcgactca 4320
cggtgagcgcagataagatactttgtacacaacagctaac 4360
attatctcttgttcgtctgtcttcggaattgtttatttctt 4400

      4410      4420      4430      4440
|||||
cttgttaggggttttgttcgtttcgaggcttgcgccgagac 4440
tgccaacgatgctagccagctctggattgtgaaggagata 4480
caaaaacggcagagatatgacctcttcgtagcaacgtctac 4520
gcgaaataacaagtatTTTTTgcctttggaacagttgcaga 4560
aggcagcgtgtatggccgagcgaagtgtgatcagccgttg 4600

      4610      4620      4630      4640
|||||
acgcttggtcttgaatgcctcttaaggTTTTTgagtgacct 4640
accaggggggaagcttcccttccctaaaccaccagcagcca 4680
ccccttcccattgtctgcgcagactttcttacagcttcca 4720
ctgggggtcttgttactcgtgcaattcagttatgtacgtga 4760
ataaattaagtgttcatgtgatcaacgcaatatgcacgtg 4800

      4810      4820      4830      4840
|||||
acgaccatttaaattggatcctctagagtcgacctgcaggc 4840
atgcaagcttggcgtaatcatgggtcatagctgtttcctgt 4880
gtgaaattgttatccgctcacaattccacacaacatacga 4920
gccggaagcataaagtgtaaagcctgggggtgcctaatgag 4960
tgagctaactcacattaattgcggttgcgctcactgcccgc 5000

      5010      5020      5030      5040
|||||
tttccagtcgggaaacctgtcgtgccagctgcattaatga 5040
atcggcccaacgcgcggggagaggcggttgcgtattgggc 5080
gctcttccgcttccctcgctcactgactcgctgcgctcggt 5120
cgttcggctgcggcgagcggtatcagctcactcaaaggcg 5160
gtaatacggttatccacagaatcaggggataacgcaggaa 5200
```



6610 6620 6630 6640  
tagtgatgctggcgaccgagttgctcttgcccggcgtcaa 6640  
tacgggataataccgcgccacatagcagaactttaaaagt 6680  
gctcatcattggaaaacgttcttcggggcgaaaactctca 6720  
aggatcttaccgctggttgagatccagttcgatgtaacca 6760  
ctcgtgcaccaactgatcttcagcatcttttactttcac 6800  
6810 6820 6830 6840  
cagcgtttctgggtgagcaaaaacaggaaggcaaaatgcc 6840  
gcaaaaaaggggaataagggcgacacggaaatggtgaatac 6880  
tcatactcttctttttcaatattattgaagcatttatca 6920  
gggttattgtctcatgagcggatacatatttgaatgtatt 6960  
tagaaaaataaacaatataggggttccgcgcacatttcccc 7000  
7010 7020 7030 7040  
gaaaagtgccacctgacgtctaagaaaccattattatcat 7040  
gacattaacctataaaaataggcgtatcacgaggcccttt 7080  
cgtc 7084

LOCUS pT2CompDHFRv2 9646 bp  
26-MAY-2015

EMBL\_ID pT2CompDHFRv2 9646 bp  
26-FEB-2015

EMBL\_ID pT2CompDHFRv2 9646 bp  
11-FEB-2015

EMBL\_ID pT2CompDHFRv2 9646 bp  
15-JAN-2015

EMBL\_ID pT2CompDHFRv2 9646 bp  
12-DEC-2014

EMBL\_ID pT2CompDHFRv2 9646 bp  
12-DEC-2014

EMBL\_ID pT2CompDHFRv2 9646 bp  
30-DEC-2014

EMBL\_ID pT2CompDHFRv2 9646 bp  
11-FEB-2015

EMBL\_ID pT2CompDHFRv2 9646 bp  
20-FEB-2015

EMBL\_ID pT2CompDHFRv2 9646 bp  
14-APR-2015

UNIMARK pT2CompDHFRv2 annotations  
pT2CompDHFRv2

ORIGIN

Features

source 1..415  
/organism="Cloning vector pUC19"  
/mol\_type="other DNA"  
/label="source Cloning vector pUC19"

---

source 1..9646  
/comment="Molecule is created with Unipro UGENE v1.13"

---

CDS complement(146..415)  
/gene="lacZalpha"  
/codon\_start=1  
/product="beta-galactosidase alpha fragment"  
/translation="MTMITPSLHACRSTLEDPRVPSNSLAVVLQRRDWNENPGVTQLNRLAAHPPFASWRNSEEARTDRPSQQLRSLNGEWRLMRYFLLTHLCGISHFSTICSDAA"  
/label="lacZalpha CDS"

---

primer\_bind complement(391..415)  
/created\_by="User"  
/label="pUC19productionR-Smi"  
/note="Geneious type: primer\_bind\_reverse"

---

misc\_feature 396..415  
/gene="lacZalpha"  
/note="multiple cloning site (EcoRI-HindIII)"  
/label="lacZalpha misc"

---

primer\_bind 401..440



|              |                        |                                                                                               |
|--------------|------------------------|-----------------------------------------------------------------------------------------------|
| misc_feature | 396..415               | /gene="lacZalpha"<br>/note="multiple cloning site (EcoRI-HindIII)"<br>/label="lacZalpha misc" |
| primer_bind  | 401..440               | /created_by="User"<br>/label="T2ko-5'F w/adp"                                                 |
| Site         | 412..419               | /label="SwaI"                                                                                 |
| misc_recomb  | 420..1336              | /created_by="User"<br>/label="T2-5'Recomb"                                                    |
| primer_bind  | 420..440               | /created_by="User"<br>/label="T2ko-5'F"                                                       |
| primer_bind  | 420..437               | /mismatches=0                                                                                 |
| promoter     | 420..1336              | /label="T2 promoter Pru"<br>/ugene_group="misc_recomb"                                        |
| primer_bind  | 1212..1231             | /label="T2comp-coloF"                                                                         |
| primer_bind  | complement(1315..1336) | /created_by="User"<br>/label="T2ko-5'R"                                                       |
| primer_bind  | 1347..1366             | /label="T2CompSeqF"                                                                           |
| primer_bind  | complement(1369..1401) | /label="T2-5p-RecombR"                                                                        |
| primer_bind  | 1385..1411             | /label="T2CDScompF"                                                                           |
| misc_feature | 1391..1393             | /label="Start"                                                                                |
| CDS          | 1394..3466             | /note="Geneious type: Concatenated sequence"<br>/label="T2_cds"                               |
| exon         | 1394..1748             | /label="Ex1"                                                                                  |
| primer_bind  | 1500..1521             | /created_by="User"<br>/label="T2colonyF"                                                      |
| primer_bind  | 1504..1521             | /note="Oligo predicted by CLC primer designer"                                                |

/note="Oligo type: primer"

/note="Melting temp.: 59.08"

/label="T2F3"

Region 1511..1579

/label="Transmembrane"

primer\_bind 1575..1592

/label="T2F wo TM"

exon 1749..1882

/label="Ex2"

primer\_bind complement(1764..1783)

/label="T2comp-coloR"

Region 1847..2722

/label="Transferase"

exon 1883..2045

/label="Ex3"

misc\_feature complement(2034..2055)

/created\_by="User"

/label="T2colonyR"

/note="Geneious type: primer\_bind\_reverse"

exon 2046..2212

/label="Ex4"

exon 2213..2372

/label="Ex5"

exon 2373..2536

/label="Ex6"

exon 2537..2777

/label="Ex7"

Region 2741..3016

/label="Ricin B lectin"

exon 2778..2863

/label="Ex8"

exon 2864..3466

/label="Ex9"

primer\_bind complement(3306..3326)

/note="Oligo predicted by CLC primer designer"

/note="Oligo type: primer"

/note="Melting temp.: 59.17"

/label="T2R3"

misc\_feature 3313..4543

/mismatches=0

/ugene\_name="verified"

primer\_bind complement(3450..3466)

|                                       |                        |
|---------------------------------------|------------------------|
| /mismatches=0                         |                        |
| primer_bind                           | complement(3450..3498) |
| /label="T2CDScompR"                   |                        |
| misc_feature                          | 3467..3472             |
| /label="GAlinker"                     |                        |
| primer_bind                           | complement(3472..3510) |
| /mismatches=0                         |                        |
| /label="T2CDSr-83-2"                  |                        |
| misc_feature                          | 3473..3496             |
| /mismatches=0                         |                        |
| /label="FLAG"                         |                        |
| /ugene_name="Tag"                     |                        |
| primer_bind                           | 3491..3517             |
| /mismatches=0                         |                        |
| /label="SAG1-3'UTRf"                  |                        |
| misc_feature                          | 3497..3499             |
| /label="Stop"                         |                        |
| 3'UTR                                 | 3500..3812             |
| /label="SAG1 3'UTR"                   |                        |
| misc_difference                       | 3587..3587             |
| /label="C->T"                         |                        |
| primer_bind                           | complement(3806..3828) |
| /mismatches=0                         |                        |
| /label="SAG1-3'UTRr"                  |                        |
| primer_bind                           | 3812..3837             |
| /mismatches=0                         |                        |
| /label="TUBp-loxPf-83-2"              |                        |
| promoter                              | 3826..4358             |
| /label="P5RT70 prmtr"                 |                        |
| primer_bind                           | 3832..3851             |
| /mismatches=0                         |                        |
| promoter                              | complement(3852..3984) |
| /label="SAG1 promoter"                |                        |
| promoter                              | 3991..4309             |
| /label="alpha tubulin TUBA1 promoter" |                        |
| misc_difference                       | 4139..4140             |
| /label="CC->GG"                       |                        |
| /ugene_group="misc_feature"           |                        |
| misc_difference                       | 4181..4183             |
| /label="GTG->CTC"                     |                        |
| misc_feature                          | 4310..4343             |
| /ugene_name="loxP"                    |                        |

|                                            |                        |
|--------------------------------------------|------------------------|
| primer_bind                                | complement(4324..4363) |
| /mismatches=0                              |                        |
| /label="TUBp-loxPr"                        |                        |
| primer_bind                                | 4344..4375             |
| /mismatches=0                              |                        |
| /label="DHFR-loxP-F"                       |                        |
| CDS                                        | 4359..6191             |
| /mismatches=0                              |                        |
| /label="DHFR"                              |                        |
| misc_feature                               | 4359..6191             |
| /source_doc="pT2CompDHFR.gb"               |                        |
| /label="DHFR from HA DHFR"                 |                        |
| /ugene_name="fragment"                     |                        |
| primer_bind                                | complement(6177..6216) |
| /label="DHFR-loxP-R"                       |                        |
| misc_feature                               | 6192..6225             |
| /mismatches=0                              |                        |
| /ugene_name="loxP"                         |                        |
| primer_bind                                | 6201..6240             |
| /label="pUC19wUPRT-vecF"                   |                        |
| misc_feature                               | 6226..9646             |
| /source_doc="pT2CompDHFR.gb"               |                        |
| /label="pUC19-T2KOvector"                  |                        |
| /ugene_name="fragment"                     |                        |
| misc_recomb                                | 6232..7368             |
| /created_by="User"                         |                        |
| /modified_by="User"                        |                        |
| /label="T2-3'Recomb"                       |                        |
| primer_bind                                | 6232..6252             |
| /created_by="User"                         |                        |
| /label="T2ko-3'F"                          |                        |
| 3' UTR                                     | 6232..6795             |
| /label="T2-3'UTR"                          |                        |
| /ugene_group="UTR"                         |                        |
| primer_bind                                | complement(6796..6815) |
| /ugene_group="gene"                        |                        |
| primer_bind                                | complement(7348..7387) |
| /created_by="User"                         |                        |
| /label="T2ko-3'R w/adpt"                   |                        |
| /note="Geneious type: primer_bind_reverse" |                        |
| primer_bind                                | complement(7348..7368) |
| /created_by="User"                         |                        |

|                                                                                                                                |                        |
|--------------------------------------------------------------------------------------------------------------------------------|------------------------|
| /label="T2ko-3'R"                                                                                                              |                        |
| Site                                                                                                                           | 7369..7376             |
| /label="SmiI"                                                                                                                  |                        |
| misc_feature                                                                                                                   | 7373..7412             |
| /gene="lacZalpha"                                                                                                              |                        |
| /note="multiple cloning site (EcoRI-HindIII)"                                                                                  |                        |
| /label="lacZalpha misc"                                                                                                        |                        |
| source                                                                                                                         | 7373..9646             |
| /organism="Cloning vector pUC19"                                                                                               |                        |
| /mol_type="other DNA"                                                                                                          |                        |
| /label="source Cloning vector pUC19"                                                                                           |                        |
| CDS                                                                                                                            | complement(7373..7429) |
| /gene="lacZalpha"                                                                                                              |                        |
| /codon_start=1                                                                                                                 |                        |
| /product="beta-galactosidase alpha fragment"                                                                                   |                        |
| /translation="MTMITPSLHACRSTLEDPRVPSSNSLAVVLQRRDWENPGVTQLNRLAAHPPFASWRNSEEARTD<br>RPSQQLRSLNGEWRLMRYFLLTHLCGISHRIWCTLSTICSDAA" |                        |
| /label="lacZalpha CDS"                                                                                                         |                        |
| gene                                                                                                                           | complement(7373..7429) |
| /gene="lacZalpha"                                                                                                              |                        |
| /label="lacZalpha gene"                                                                                                        |                        |
| primer_bind                                                                                                                    | 7373..7398             |
| /created_by="User"                                                                                                             |                        |
| /label="pUC19productionF-Smi"                                                                                                  |                        |
| -10_signal                                                                                                                     | complement(7474..7479) |
| /note="Plac promoter (drives lacZalpha;<br>counter-clockwise); TATGTT"                                                         |                        |
| /label="-10 signal"                                                                                                            |                        |
| -35_signal                                                                                                                     | complement(7498..7503) |
| /note="Plac promoter (drives lacZalpha;<br>counter-clockwise); TTTACA"                                                         |                        |
| /label="-35 signal"                                                                                                            |                        |
| protein_bind                                                                                                                   | complement(7523..7535) |
| /note="CAP protein binding site"                                                                                               |                        |
| /bound_moiety="catabolite activator protein (CAP)"                                                                             |                        |
| /label="CAP protein binding site protein bind"                                                                                 |                        |
| rep_origin                                                                                                                     | complement(7827..8415) |
| /note="pMB1 origin of replication (counter-clockwise)<br>(RNAPII -35 to RNA/DNA switch point)"                                 |                        |
| /label="rep origin"                                                                                                            |                        |
| misc_RNA                                                                                                                       | complement(7827..8379) |
| /note="RNAPII transcript (complementary strand)"                                                                               |                        |

/label="RNA"

-35\_signal 8233..8238

/note="RNAI promoter (clockwise); TTGAAG"

/label="RNAI promoter (clockwise); TTGAAG -35 signal"

-10\_signal 8255..8260

/note="RNAI promoter (clockwise); GCTACA"

/label="RNAI promoter (clockwise); GCTACA -10 signal"

misc\_RNA 8269..8376

/note="RNAI transcript"

/label="RNAI transcript"

-10\_signal complement(8389..8394)

/note="RNAII promoter (counter-clockwise); CGTAAT"

/label="-10 signal"

-35\_signal complement(8410..8415)

/note="RNAII promoter (counter-clockwise); TTGAGA"

/label="-35 signal"

CDS complement(8586..9446)

/gene="bla"

/note="ampR (confers resistance to ampicillin)"

/codon\_start=1

/product="beta-lactamase"

/translation="MSIQHFRVALIPFFAAAFCLPVFAHPETLVKVKDAEDQLGARVGYIELDLNSGKILESFRPEERF  
 PMMSTFKVLLCGAVLSRIDAGQEQLGRRIHYSQNDLVEYSPVTEKHLTDGMTVRELCSAAITMSDNTAANLLLTTIGG  
 PKELTAF LHNMGDHSVTRLDRWEPELNEAIPNDERDTTMPVAMATTLRKLTTGELLTLASRQQLIDWMEADKVVAGPLL  
 RSALPAGWFIADKSGAGERGSRGIIAALGPDGKPSRIVVIYTTGSQATMDERNRQIAEIGASLIKHW"

/label="bla CDS"

gene complement(8586..9446)

/gene="bla"

/label="bla gene"

sig\_peptide complement(9378..9446)

/gene="bla"

/note="required for secretion to the periplasm; cleaved  
 off to form the mature beta-lactamase protein."

/label="bla signal peptide"

-10\_signal complement(9490..9495)

/note="bla promoter (counter-clockwise); GAGACA"

/label="-10 signal"

-35\_signal complement(9511..9516)

/note="bla promoter (counter-clockwise); TTCAAA"

/label="-35 signal"

10 20 30 40  
TCGCGCGTTCGGTGATGACGGTGAAAACCTCTGACACAT 40  
GCAGCTCCCGGAGACGGTCACAGCTTGTCTGTAAGCGGAT 80  
GCCGGGAGCAGACAAGCCCGTCAGGGCGCGTCAGCGGGTG 120  
TTGGCGGGTGTTCGGGGCTGGCTTAACTATGCGGCATCAGA 160  
GCAGATTGTACTGAGAGTGCACCATATGCGGTGTGAAATA 200  
210 220 230 240  
CCGCACAGATGCGTAAGGAGAAAATACCGCATCAGGCGCC 240  
ATTCGCCATTTCAGGCTGCGCAACTGTTGGGAAGGGCGATC 280  
GGTGCGGGCCTCTTCGCTATTACGCCAGCTGGCGAAAGGG 320  
GGATGTGCTGCAAGGCGATTAAAGTTGGGTAACGCCAGGGT 360  
TTTCCCAGTCACGACGTTGTAAAACGACGGCCAGTGAATT 400  
410 420 430 440  
CGAGCTCGGTAATTTAAATACTCTCCTCGCTGCGGTTCTT 440  
TCCTTCTTAAGAGCATCCGTTGTCGCGTCCTGACCCTCTC 480  
CCCCCCCACCCTCCGCGAGAACGGGGAAAACCTGAACCCT 520  
CTGAGAAATGAAGCGCTCTCGTCAGACGCGGCGACTCGC 560  
CACGGACTTTCCAGAAAAGTCAACGCGTGGAAGTGAAGGC 600  
610 620 630 640  
CGCTCTCGAAGGCTCTCTGCCCTGCACCTTGAGCCCAGAT 640  
GTATTGCGAAGGAAGGCCTGCCGCACTGCCTCGTCTCGAC 680  
AAGGTTGTCTCCTGCGCCGCCGGGACTCGACTAAGAAGAA 720  
TCTTCGCAAACGCTTCACACTCCTCATGTGCTCGAGTTCTG 760  
GTCCTCGTTCCCAGGCTCCTCGTTCCTCTCTTCCCCTGTC 800  
810 820 830 840  
TCCGCGGGCTCTTCGCGTCCACCGAAAAGCGGTCTTCCTC 840  
CTCAAGAAAACGGATCGCCTTTCTGTGGGGAACATCCGTG 880  
TTCTCCCCTCGGCGTGTGAACTAGGAAGCTCGCAGCGTC 920  
TCAACTTCTTAAATCTATTTACATTTTAAAGTGAATCATA 960  
TATGCATATTTGTGTTTAAATAAGGTAAACATAACTGTAT 1000  
1010 1020 1030 1040  
ACAGATTTATACTATAACCATAAGCATAAATACACATATA 1040  
GATATATGTATACGTATATGTCTCAGCGCCGTTGAATCCC 1080  
CTTCTGGTGTCCGTCTGGGAACTGTGCAACTTCTCTTG 1120  
GTGGGGGATTGTGGGTTCGGCGGCGCCTACGCTCTCAACTC 1160  
GCTTCTGTCTCTTCTCGGTTCTTCTGGAGTTCTGATGGT 1200  
1210 1220 1230 1240  
TCCACAAGGACTCCCCGTTACCATTTTCGTCCGCTCTTTGA 1240  
CTTCGTTCACTTCCTCTCTGCTGGGCAAGCGATACGTGAA 1280  
GGCCCTGGCCTAGGCTGCCATTGTTCTCTCTCCTCGTTCTG 1320  
TTCCCAGAGGAGCCTTATTTCTCTCCGTCTTGGCCTCTGTT 1360  
CTGGTGCTTCGCCTTCCATTCTCGTCTACTATGCCGGTCTG 1400

1410 1420 1430 1440  
AGTGCCCAGTGGGAGGCGGCCAGGAGACGCCGCGAGCCTC 1440  
GTGGCGGAGGGGAGAGCCGGGCAAGAAGCCGCTGAACTCG 1480  
AAGCTGGTCGCGCGGCTGCGGCGTCCGGTGTTCGCTTCTGC 1520  
TCGGATCGCTCTGCGTGAGTGTGGGGATTTTCTGGTGTCT 1560  
CTTCTCCTCGGGAGTTCTCACGCTGCTCTTCCCCGGCGCC 1600

1610 1620 1630 1640  
TTCAGCCGCGACTCGCCTCAGACGCACTCCCTGGACTTGC 1640  
ATGCACCTGCAGTCGCCGAACTCCACAGCCTCCTCAAAGG 1680  
CCTGCCCTTCCCGACGCACCACGAAAAAGCCACCGTCGAC 1720  
AACAGCGCAATCGTCGTCGGCGTCCACGGCACAGTGAAGG 1760  
CACCGTACAGCAGAGTCGTCGACCATCTGTTGAAGATCGT 1800

1810 1820 1830 1840  
GGTACTTCCGGTGTGACAGGAGAGCCGCGTTACGTGACT 1840  
GGAGACGATTTCTCAGTTATCATTCCTGTTGCAATGAAG 1880  
AGGCGTATCTTCCCAAGACGTTGACTTTCTTGTTCGAAGT 1920  
AACTCCAATCGAGCGCATCCGCGAGGTGATTGTCGTCGAC 1960  
GACCACAGCGACAAGCCGATAAAAGCAATTCTGGAGAAGA 2000

2010 2020 2030 2040  
CGCTTCTCAACACATCCTCGACAAGACGCGCATCATCCG 2040  
CTTCGACTCGCCTCAAGGCTTAATTCGCGGACGGGTGGCG 2080  
GGAGCAGCGATTGCGACAAGCGACAACTTTTTCTTTCTCG 2120  
ACGGACACTGCAGACCGAAGGTCGGCTGGGCGGAGCCTCT 2160  
CCTCGCGCATTTGAAAACCAATTACCGGAGAATTGCTTGC 2200

2210 2220 2230 2240  
CCCAAGATTTACGATATTTACCTGGACTCCTGGGAAGACG 2240  
TCGGCACCCACGGAACGAAGATGATGTTTGAGTGGACTTT 2280  
CGAATTCGGCTGGTTTGAAGACCTCGAAGACGAAGTCCCC 2320  
GTGCTTGCAGGCGGCATTCTCGCGATGACTAAGAAGTGGT 2360  
GGATTGAGTCCGGGCTGTACGACGAAGGCATGCTCGAGTG 2400

2410 2420 2430 2440  
GGGTGGAGAAAATCTGGAGCAGTCGATTCGCTCCTGGCTC 2440  
TGCGGAGGCGAAATCGTGGCCGTGCAGGAGTCAAAAATCG 2480  
GACACATTTTCTCGAGGCCTCCGAAACCGAATCCAGGAAA 2520  
TCGACTTGTACATACAGGTCCAGAAGAATCAGAAACGCGGA 2560  
GCGAAAGTCTGGCTGGACGAGTACTACTTTTTTATTCTACA 2600

2610 2620 2630 2640  
AGTACCACCGGGAAGTGCCTGGACACCAGGAAGGCGACAT 2640  
TACGCAGCGAAAGAACTGCGGTACGAACAGTTGACTTGC 2680  
ATGCCATTCAGTGGTACGTGGAGAAATTCAAAACCTGCCT 2720  
TCGACCGCAAGGGACTTCTCGACCACAACCTTCTCCACAT 2760  
TGAACACGAACAAACAGGCCTGTGTCTCTCCTCTGCGTAC 2800







5610 5620 5630 5640  
CGCAATCTCCCCACCGAGAGGTCGGAGACATCGGCCCGG 5640  
GCTACGGCTTCCAGTGGAGACACTTCGGCGCGGCATACAA 5680  
AGACATGCACACAGACTACACAGGGCAGGGCGTCGACCAG 5720  
CTGAAGAATGTGATCCAGATGCTGAGAACGAATCCAACAG 5760  
ATCGTTCGCATGCTCATGACTGCCTGGAATCCTGCAGCGCT 5800

5810 5820 5830 5840  
GGACGAAATGGCGCTGCCGCCTTGTCACTTGTTGTGCCAG 5840  
TTCTACGTGAACGACCAGAAGGAGCTGTCGTGCATCATGT 5880  
ATCAGCGGTCGTGCGATGTCGGCCTCGGCGTCCCCTTCAA 5920  
CATCGCTTCCATATTCGCTTTTGACGCTCATGGTTGCACAC 5960  
GTCTGCAACCTAAAACCTAAGGAGTTCATTCACTTCATGG 6000

6010 6020 6030 6040  
GGAACACGCATGTCTACACGAACCATGTCGAGGCTTTAAA 6040  
AGAGCAGCTGCGGAGAGAACCGAGACCGTTCCCATTTGTG 6080  
AACATCCTCAACAAGGAACGCATCAAGGAAATCGACGATT 6120  
TCACCGCCGAGGATTTTGAGGTCGTGGGCTACGTCCCGCA 6160  
CGGACGAATCCAGATGGAGATGGCTGTCTAGATAACTTCG 6200

6210 6220 6230 6240  
TATAGCATAACATTATACGAAGTTATGGTACCAGCGTAAGC 6240  
GAGAAACGGCACACAAGGCGGCCGTTTCAGTTCTCCCGGC 6280  
GTTCGCAACGAAACCCCCAAACGGGGAAAACGGCGACAC 6320  
CCAGGAGGCAGAACGGCTATACGCGACGGGGGAGAAGGCG 6360  
ATCCACGGAAGAGCACACCCGTCGCCGAATGCAGACTGCA 6400

6410 6420 6430 6440  
AAGAGCTGTACAAACGAACCCGGCGCCACAAAAACGAGCG 6440  
TGTAGATAAACGAAAAAAGCAGAATCGCGAAGTTGGCTG 6480  
GCGCTCCAACCTGGCACGAGAAATTTAGGTGTACATACATA 6520  
TGGTCCGATGTACAGACACCCGAGGAACTCCGAGTGTCTC 6560  
TCGGTGTAATTTCCGCGTCTTGTTTTCTCCTCGACTCAGA 6600

6610 6620 6630 6640  
GGGGAAATAGTGTACACTGACTTTTTCTTTTACATCGAGG 6640  
CTCAGCGCGCAGAACGTCTCTTTTTTCCGTTTGAAGACAC 6680  
AGTCGTTCGGAAGTCTCTTCTTTTGGTGTAGCGATACTGCT 6720  
TTTCGCTGGTGGTGGCGAAGCGCCGAGCCGGGTTCATCAA 6760  
CAGCCGTTTTAAAACAGATTTTTTGAACCTAAGAGACACAGAG 6800

6810 6820 6830 6840  
CCACTGCATTTTGACGATCAAGCTGCATTACATGTAGACT 6840  
TTTACTGCTGTTTTAGTTTTCCAGCGAAGCTTCCTTCGT 6880  
CTTTTTATTTGCATACTGTTTTTCGCAACGCGATGCCGCT 6920  
CAGCAGCAGGCAGAGCCTCTCTCCTGGAGGCGCAGTGTTT 6960  
TCTTTTTTTCGTACTACTGGATCGACCAGCCGTTGCGGCCGC 7000

7010 7020 7030 7040  
GAGTCTCTTTCCGGAGCAGTTCCGCTTCTTTGCCCGTACGG 7040  
GGTCTCTGTGGGGCAGACTCTTAGGCGAAAGCAGCGAGT 7080  
GCGGCGACTCTGTGTAGTCGGGAGACGCGTGGAAAAAGCG 7120  
CGGCGCGAAATGGATTTCTGGATGCGGAGAAAGAGTTGAG 7160  
GTTGTCGATCTTTCGCAACTGGAGTGATTCTGGCCTGCCT 7200  
7210 7220 7230 7240  
GTTCTCACAAAAACAAATGAGCATCTATGCCGGCTTTTG 7240  
CGACTTGGAGAAGTGTACTGACATCTGTTTCGAGGTGTTGG 7280  
AGCGTAAACTGTTCCCTTCTGATCTTTCGGTGGAGTCTTTC 7320  
AAGCTCTCAGTTTTCTCGCTCTTTGTCGACCTTTGCGGAA 7360  
GCGTTTGCATTTAAATGGATCCTCTAGAGTCGACCTGCAG 7400  
7410 7420 7430 7440  
GCATGCAAGCTTGGCGTAATCATGGTCATAGCTGTTTCCT 7440  
GTGTGAAATTGTTATCCGCTCACAATTCCACACAACATAC 7480  
GAGCCGGAAGCATAAAGTGTAAGCCTGGGGTGCCTAATG 7520  
AGTGAGCTAACTCACATTAATTGCGTTGCGCTCACTGCC 7560  
GCTTTCAGTCGGGAAACCTGTCGTGCCAGCTGCATTAAT 7600  
7610 7620 7630 7640  
GAATCGGCCAACGCGCGGGGAGAGGCGGTTTGCGTATTGG 7640  
GCGCTCTTCCGCTTCCTCGCTCACTGACTCGCTGCGCTCG 7680  
GTCGTTCCGCTGCGGCGAGCGGTATCAGCTCACTCAAAGG 7720  
CGGTAATACGGTTATCCACAGAATCAGGGGATAACGCAGG 7760  
AAAGAACATGTGAGCAAAGGCCAGCAAAGGCCAGGAAC 7800  
7810 7820 7830 7840  
CGTAAAAAGGCCGCGTTGCTGGCGTTTTTCCATAGGCTCC 7840  
GCCCCCTGACGAGCATCACAAAATCGACGCTCAAGTCA 7880  
GAGGTGGCGAAACCCGACAGGACTATAAAGATAACCAGGCG 7920  
TTTCCCCCTGGAAGCTCCCTCGTGCGCTCTCCTGTTCCGA 7960  
CCCTGCCGCTTACCGGATACCTGTCCGCCTTTCTCCCTTC 8000  
8010 8020 8030 8040  
GGGAAGCGTGGCGCTTCTCATAGCTCACGCTGTAGGTAT 8040  
CTCAGTTCGGTGTAGGTCGTTTCGCTCCAAGCTGGGCTGTG 8080  
TGCACGAACCCCCGTTTACGCCGACCGCTGCGCCTTATC 8120  
CGGTAACCTATCGTCTTGGAGTCCAACCCGGTAAGACACGAC 8160  
TTATCGCCACTGGCAGCAGCCACTGGTAACAGGATTAGCA 8200  
8210 8220 8230 8240  
GAGCGAGGTATGTAGGCGGTGCTACAGAGTTCTTGAAGTG 8240  
GTGGCCTAACTACGGCTACACTAGAAGAACAGTATTTGGT 8280  
ATCTGCGCTCTGCTGAAGCCAGTTACCTTCGGAAAAAGAG 8320  
TTGGTAGCTCTTGATCCGGCAAACAAACCACCGCTGGTAG 8360  
CGGTGGTTTTTTTTGTTTGAAGCAGCAGATTACGCGCAGA 8400



LOCUS pT3Comp 11949 bp  
 23-JUL-2014

EMBL\_ID pT3Comp 11949 bp  
 23-APR-2014

EMBL\_ID pT3Comp 11949 bp  
 22-APR-2014

EMBL\_ID pT3Comp 11949 bp  
 12-MAY-2014

UNIMARK pT3Comp annotations  
 pT3Comp

ORIGIN

Features

rep\_origin 1..217  
 /note="ori2; oriS"  
 /label="ori2; oriS rep origin"

misc\_feature 1..1804  
 /label="pSMART-BAC2-5'"

source 1..11949  
 /comment="Molecule is created with Unipro UGENE v1.13"

rep\_origin 293..907  
 /note="oriV"  
 /label="oriV rep origin"

primer\_bind 1765..1784  
 /label="pSMART-seqF"

primer\_bind complement(1787..1812)  
 /label="pBAC2-SwaI-R"

primer\_bind 1793..1832  
 /label="T3-5p-RecombF"

primer\_bind 1804..1824  
 /label="T3-UPRTf"  
 /ugene\_group="misc\_recomb"

misc\_feature 1805..1812  
 /label="SwaI"

misc\_recomb 1813..2858  
 /created\_by="User"  
 /label="5' Recomb"

primer\_bind 1813..1833  
 /created\_by="User"  
 /label="T3ko-5'F"

misc\_feature complement(2838..2858)  
 /created\_by="User"  
 /label="T3ko-5'R"  
 /note="Geneious type: primer\_bind\_reverse"

primer\_bind 2945..2964  
 /label="T3CompSeqF"

primer\_bind complement(2966..2991)  
 /mismatches=0

primer\_bind 2977..3009  
 /label="T3CDRcompF"

```

/label="T3ko-5'R"
/note="Geneious type: primer_bind_reverse"
primer_bind          2945..2964
/label="T3CompSeqF"
primer_bind          complement(2966..2991)
/mismatches=0
primer_bind          2977..3009
/label="T3CDRcompF"
primer_bind          2977..2991
/mismatches=0
misc_feature         2988..2990
/label="Start"
CDS                  2991..4892
/label="T3_dcs (concatenated sequence 2)"
/note="Geneious type: Concatenated sequence"
primer              2991..3007
/note="Forward primer region"
/label="F1"
Region              3048..3116
/label="TransMembrane"
primer              3219..3245
/label="primer from paper"
Region              3420..4454
/label="Transferase"
Region              4476..4829
/label="Ricin-B-Lectin"
primer_bind         4477..4498
/created_by="User"
/label="T3colonyF"
primer              complement(4525..4548)
/label="primer from paper"
misc_feature        complement(4818..4839)
/created_by="User"
/label="T3colonyR2"
/note="Geneious type: primer_bind_reverse"
primer_bind         complement(4874..4926)
/label="T3CDRcompR"
primer              complement(4876..4892)
/note="Reverse primer region"
/label="R1"
misc_feature        4893..4898
/label="GAlinker"
    
```

|                                            |                        |
|--------------------------------------------|------------------------|
| misc_feature                               | 4899..4922             |
| /mismatches=0                              |                        |
| /label="FLAG"                              |                        |
| /ugene_name="Tag"                          |                        |
| primer_bind                                | 4910..4949             |
| /label="T3-3p-RecombF"                     |                        |
| primer_bind                                | 4910..4926             |
| /mismatches=0                              |                        |
| misc_feature                               | 4923..4925             |
| /label="Stop"                              |                        |
| misc_feature                               | 4926..5440             |
| /Source="annotation"                       |                        |
| /isDeprecated=0                            |                        |
| /label="UTR"                               |                        |
| /ugene_name="UTR"                          |                        |
| misc_recomb                                | 4987..6167             |
| /created_by="User"                         |                        |
| /label="3'Recomb"                          |                        |
| primer_bind                                | 4987..5007             |
| /created_by="User"                         |                        |
| /modified_by="User"                        |                        |
| /label="T3ko-3'F"                          |                        |
| misc_feature                               | complement(5289..5308) |
| /created_by="User"                         |                        |
| /label="T3detectR"                         |                        |
| /note="Geneious type: primer_bind_reverse" |                        |
| primer_bind                                | complement(5449..5466) |
| /label="T3-UPRTr"                          |                        |
| misc_feature                               | complement(6147..6167) |
| /created_by="User"                         |                        |
| /label="T3ko-3'R"                          |                        |
| /note="Geneious type: primer_bind_reverse" |                        |
| primer_bind                                | complement(6148..6183) |
| /label="T3-3p-RecombR"                     |                        |
| misc_feature                               | 6168..11949            |
| /label="pSMAR-BAC2-3' "                    |                        |
| primer_bind                                | 6168..6186             |
| /label="pBAC2-F"                           |                        |
| misc_feature                               | 6168..6183             |
| /ugene_group="primer_bind"                 |                        |
| CDS                                        | 6390..7049             |
| /gene="CAT"                                |                        |



/EC\_number="2.3.1.28"  
 /codon\_start=1  
 /transl\_table=11  
 /product="chloramphenicol acetyltransferase"  
 /protein\_id="ABW82143.1"  
 /db\_xref="GI:158854232"  
 /translation="MEKKITGYTTVDISQWHRKEHFQSVQCTYNQTVQLDITAFVKTVKKNKHKFYPAFIHILARLMNAHPEFRMAMKDGELVIWDSVHPCYTVFHEQTEFSSLWSEYHDDFRQFLHIYSQDVACYGENLAYFPGGFIEENMFFVSANPWVSFTSFDLNVANMDNFFAPVFTMGKYYTQGDKVLMLPLAIQVHHA VCDGFHVGRMLNELQQYCDEWQGGGA"  
 /label="CAT CDS"

gene 6390..7049  
 /gene="CAT"  
 /label="CAT gene"

misc\_feature 7120..7153  
 /note="loxP site"  
 /label="loxP site"

misc\_feature 7167..7569  
 /note="cosN"  
 /label="cosN"

CDS complement(8376..9347)  
 /gene="sopB"  
 /note="partitioning protein; essential for partitioning ofF' plasmid replicon (RepFIA)"  
 /codon\_start=1  
 /transl\_table=11  
 /product="SopB"  
 /protein\_id="ABW82144.1"  
 /db\_xref="GI:158854233"  
 /translation="MKRAPVIPKHTLNTQPVEDTSLSTPAAPMVDSL IARVGV MARGNAITLPVCGRDVKFTLEVLRGDSVEKTSRVWSGNERDQELLTEDALDDLIPSFLLTGQQTPAFGRRVSGVIEIADGSRRRKAALTESDYRVLV GELDD EQMAALSRLGNDYRPTSAYERGQRYASRLQNEFAGNISALADAENISRKIIITRCINTAKLPKSVVALF SHPGELSARSGDALQKAFTDKEELLKQQASNLHEQKAGVIFEAEVITLLTSVLKTSSASRTSLSSRHQFAPGATVLYKGDKMVLNLDRSRVPTECIEKIEAILKELEKPAP"  
 /label="sopB CDS"

gene complement(8376..9347)  
 /gene="sopB"  
 /label="sopB gene"

CDS complement(9347..10522)  
 /gene="sopA"  
 /note="partitioning protein; essential for partitioning ofF' plasmid replicon (RepFIA)"



pT3Comp-1.seq

410 420 430 440  
TAAAAGACAGGTTAGCGGTGGCCGAAAAACGGGCGGAAAC 440  
CCTTGCAAATGCTGGATTTTCTGCCTGTGGACAGCCCCTC 480  
AAATGTCAATAGGTGCGCCCCTCATCTGTCAGCACTCTGC 520  
CCCTCAAGTGTCAAGGATCGCGCCCCTCATCTGTCAGTAG 560  
TCGCGCCCCTCAAGTGTCAATACCGCAGGGCACTTATCCC 600

610 620 630 640  
CAGGCTTGTCCACATCATCTGTGGGAAACTCGCGTAAAAT 640  
CAGGCGTTTTTCGCCGATTTGCGAGGCTGGCCAGCTCCACG 680  
TCGCCGGCCGAAATCGAGCCTGCCCTCATCTGTCAACGC 720  
CGCGCCGGGTGAGTTCGGCCCCTCAAGTGTCAACGTCCGCC 760  
CCTCATCTGTGAGTGTGAGGGCCAAGTTTTCCGCGAGGTATC 800

810 820 830 840  
CACAAACGCCGGCGGCCGGCCGCGGTGTCTCGCACACGGCT 840  
TCGACGGCGTTTTCTGGCGCGTTTGCAGGGCCATAGACGGC 880  
CGCCAGCCCAGCGGCGAGGGCAACCAGCCGAGGGCTTCGC 920  
CCTGTGCTCGACTGCGGCGAGCACTACTGGCTGTAAAAG 960  
GACAGACCACATCATGGTTCTGTGTTTCATTAGGTTGTTCT 1000

1010 1020 1030 1040  
GTCCATTGCTGACATAATCCGCTCCACTTCAACGTAACAC 1040  
CGCACGAAGATTTCTATTGTTTCTGAAGGCATATTTCAAAT 1080  
CGTTTTTCGTTACCGCTTGCAGGCATCATGACAGAACAATA 1120  
CTTCCCTATAAACGCTACACAGGCTCCTGAGATTAATAATG 1160  
CGGATCTCTACGATAATGGGAGATTTTCCCGACTGTTTCG 1200

1210 1220 1230 1240  
TTTCGCTTCTCAGTGGATAACAGCCAGCTTCTCTGTTTAAAC 1240  
AGACAAAAACAGCATATCCACTCAGTTCCACATTTCCATA 1280  
TAAAGGCCAAGGCATTTATTCTCAGGATAATTGTTTCAGC 1320  
ATCGCAACCGCATCAGACTCCGGCATCGCAAACCTGCACCC 1360  
GGTGCCGGGCAGCCACATCCAGCGCAAAAACCTTCGTGTA 1400

1410 1420 1430 1440  
GACTTCCGTTGAACTGATGGACTTATGTCCCATCAGGCTT 1440  
TGCAGAACTTTTCAGCGGTATAACCGGCATACAGCATGTGCA 1480  
TCGCATAGGAATGGCGGAACGTATGTGGTGTGACCGGAAC 1520  
AGAGAACGTACACCCGTCAGCAGCAGCGGCGGCAACCGCC 1560  
TCCCAATCCAGGTCCTGACCGTTCTGTCCGTCCTTCCC 1600

1610 1620 1630 1640  
AGATCCGCGCTTCTCTGTCTCCTTCCCTGTGCGACGGTTACG 1640  
CCGCTCCATGAGCTTATCGGGTCCACTCGCGAACGCAGAA 1680  
AGGCCACCCGAAGGTGAGCCAGTGTGATTACATTTGCGG 1720  
CCTAACTGTGGCCAGTCCAGTTACGCTGGAGTCACTAGTA 1760  
TTTAGGTGACACTATAGAAGCGGCCGCGACAACCTTGTCCA 1800

1810 1820 1830 1840  
CGTGATTTAAATAAAGATGCGCCGCGATCAAACAGCGAG 1840  
AACTTTAAGACCTCAAGCGCGCCTTAGGGCGCGAACAGCA 1880  
GAGAGAAAAGCTGCGTGCTAGAGGAAACGAAACCCAGTCA 1920  
ACATTTGTAAAACCGCCATGTTTTCCGGGGTTATTTATTT 1960  
TTTATACGAGAACCCGCAGGACACAGCTGGAGAGCTGTTGG 2000

2010 2020 2030 2040  
GGAAAAAAGCCTTTGTGTGTGCGAGTGCATGTGCAAGGGA 2040  
GGTAAACTGGCTCCGCCGCTCCCCTGCGCTGGCAATTTGC 2080  
CATTCTTACAGCTCTCGTTTCCTTCCCCTTCTGTGCGCTA 2120  
TACGCTTTTTCGTTTCAGGGGTGCTTTGTTTCTGCGAGACC 2160  
AGTGCCTTGCCCCCTTCTCGTATGTCACCCCGTCTGTGTTT 2200

2210 2220 2230 2240  
CGGGATGCTGCTGCGTGCACCGAGTCTGGCTCGCTTCGAG 2240  
GAAAACGAACGAGTGTGAGTTTACTCACTTCTGCTCGAA 2280  
AAGTCAAATGCGTGTTTTTCTCCACTGGTAGGACAAATGT 2320  
ACTTATTTTGGCCATCAACAGACGCCTGAGCCCACACTGC 2360  
TGCACATCCGCCCTGTTAGACAGGTCGGCATTGCTTTTGC 2400

2410 2420 2430 2440  
TCGTGTGTGCGCGGCATCTGCGTGAGACACAACCTATCCAG 2440  
TGTGCACATGCTTGTAGTAACTATGCGAAAGAGCCACAA 2480  
AATCCGCTGATCATACTATGCATGCTTGATCATGCGT 2520  
GATTCAGTGTGAGCAAGTGCAGAAACTGCCGGTTTGCCG 2560  
GCAAGAGTCGCTTTTTCTAGCTGCATCACCAAGAGACCAA 2600

2610 2620 2630 2640  
CTAGAGGAAGTACATCGTGTTTCGTGCTCCCGACATCTCCA 2640  
TTTCCTGTGTGCTGCGTGCTTTGCTTTTCTCTCAACCTT 2680  
CCGTTTTTTCGTTTCTGTTTCGCGAAATGTCGATCGAACAGT 2720  
GCAATTCTCTGTTGTCCCTCACTGCGTTTGCCAAATGCCAT 2760  
AAGACAGTTACGTCCTGTCACACAAATCGCCATCATTCCC 2800

2810 2820 2830 2840  
CCTGTCTCTTCCACGTTTCTGCACAAGCACCTCACGTGGT 2840  
CGGCGGTGCTCATTTGAATCCTTCGTTTCTGTGTTCTCCA 2880  
CGTTCCGTCGCTTCCCCCCTTCCCGTACAAGCACTGCTT 2920  
CGGTTGTTTTTCGGCAAGTTCCTTCGCGTCTGGTTTTCGGTA 2960  
CTCAAACGAATCAGGAGCGGCTGAGAATGAGGGTTATGA 3000

3010 3020 3030 3040  
CGCCTCCGTCGGCGCCTCACCCGCGGCATCGCCGTGGTG 3040  
GGCGAGTTGCCTCTGGGCGGCCCTCCAGATCATTTCTTTTT 3080  
TTGGTCGGCATATGCTGGGTGGCAGTGAATGTCGGGTTTC 3120  
TCTCTGATTATTACTTCAAAGGTTTCAATTTCTCGTCACC 3160  
ATCGCTCAACAACAACAGCGATGCTTCTCGCCAACCGCCG 3200

3210 3220 3230 3240  
CGCGCCGCCAGAGATGTGCAGGAAGGCGTGTTCGTCGTTTG 3240  
AAGAATCCGGAGGGGCGCAGCTCCCGCCGCGTGTGCACGC 3280  
ACTTGAGGTTCTTGAGGGAGCTGGCCCCGGCCGACTTCAC 3320  
GGGAGGCTCGGAATCAAACCTGATGGCCAGCCGGGCTACA 3360  
CACGGGCACCCTCGCCTCCTACAGATCTGAGCATGCCCA 3400  
3410 3420 3430 3440  
AGCACTGGCTCGCGGGGGAGGCTTCAATCTGTATCTGTCT 3440  
GACCATCTGGAGCTGGACCGCACGGCGCCTGACGCGCGGC 3480  
ACGCGTCCTGTTCGGCAGCTACACTACGACCTCTCGACGCT 3520  
GCCGAAGGCATCAGTGATTATCGTGTTTTACAACGAGCCA 3560  
TTTTTCGACGTTGATGCGGTCCGTCCACAGCGTTCTGAACG 3600  
3610 3620 3630 3640  
GGACTCCTCCGCAGATTCTGGAGGAGCTGATTCTCGTCGA 3640  
CGATGGCAGCACGTTGCCGTACATCCGGGAAGACGGCAAC 3680  
CAACAGTTGGTGGAGTACCTTAAGCTGCTTCCGGCGAAGG 3720  
TGCGGCTCATCCGCAACGAGGTGCGCAAAGGGATTGTCGG 3760  
TGCACGGATGAAGGGGATTTCGCGGAGTCGCGCGCCGATC 3800  
3810 3820 3830 3840  
TTCGCTATCCTCGACAGCCACATCGAGGTGAGTCCTCAGT 3840  
GGCTGGAGCCGCTGCTGCTGCGGATCAAGGAAGACGGCCG 3880  
GCGCGTGGTGTATGCCGCAGATCGATGGAATCGACGCGGAA 3920  
ACCTTCAAGCACATCGCCGGCGGGATAGGCTGCAAGCTGG 3960  
GGTTTCTCTGGAAGCTGATGGAGCACTCGTACGAGGGCCA 4000  
4010 4020 4030 4040  
CCAGACCGCGCGACTGCCGCCGGAGGAACGCCAACCGTCT 4040  
CCGACCGACTTTCAGACGTCGCCGGCGATGGCCGGGGGTC 4080  
TTTTTGCAGCGAACAAGGCGTTCTTCTTTGACGTCGGAGC 4120  
CTACGATGAAGACTTCCAGTTCTGGGGAACAGAAACTTA 4160  
GAACTGAGTTTTCCGCCTCTGGCAGTGCGGCGGCGTCTTGG 4200  
4210 4220 4230 4240  
AGTGCGCTCCTTGCTCTCGCGTCTACCACATCTTTCGAAA 4240  
AGGCGGCTCCGGCTACAGCAGTCCAGGCGACTCCATCACC 4280  
ATCAACAAGATGCGGACGATGCTGTGGATGGACGAGTATG 4320  
CCGACCTCGCCTGGCGAGTCATTGGGAAACCCAGAGTCAA 4360  
CTACCGGCCCGAGAGCCTTGAAAAACGCAGAGAGTGGAGA 4400  
4410 4420 4430 4440  
AAGAGGAAGGGATGTAAAAGCTTCCGCTGGTTCATGGAAA 4440  
ACGTCTTTCCCGAGGGAGATGTCGTCACTCTCGACGACGT 4480  
CCCGTACCTTGGCCCTTTGAGAAATGACAAGATAGGCATG 4520  
TGT'TTGGACAACATGGGCTGGGCC'TCTCCCGGACATGCTG 4560  
TTGGCCTCGAGTATTGCCACGGGGGCGACACTCAGACATT 4600



6010 6020 6030 6040  
GGACTTCACGGGCTTTTACACAGCGCACTATGGTGCCCAG 6040  
TCATGGTATACGCTTGCATCCAGTGTTCGAGCACACAAAG 6080  
GCGAATGTACACCCTTTGACAACCGAAGCGACTCCGGCGA 6120  
TGCCCTACTCTCTAATGGATTGAAAATTCGTGCATGCGTCC 6160  
ACTCTTTACGTGACTTGAAGTCGCGGCCGCACTGACCCTA 6200

6210 6220 6230 6240  
TAGTGAGTCGTATTAATTTAAATCATAACCAACATGGTCAA 6240  
ATAAAACGAAAGGCTCAGTCGAAAGACTGGGCCTTTTCGTT 6280  
TTAATCTGATCGGCACGTAAGAGGTTCCAACCTTTCACCAT 6320  
AATGAAATAAGATCACTACCGGGCGTATTTTTTTGAGTTAT 6360  
CGAGATTTTTCAGGAGCTAAGGAAGCTAAAATGGAGAAAAA 6400

6410 6420 6430 6440  
AATCACTGGATATACCACCGTTGATATATCCCAATGGCAT 6440  
CGTAAAGAACATTTTGAGGCATTTTCAGTCAGTTGCTCAAT 6480  
GTACCTATAACCAGACCGTTTCAGCTGGATATTACGGCCTT 6520  
TTTAAAGACCGTAAAGAAAAATAAGCACAAGTTTTATCCG 6560  
GCCTTTTATTCACATTCTTGCCCCGCTGATGAATGCTCATC 6600

6610 6620 6630 6640  
CGGAATTTTCGTATGGCAATGAAAGACGGTGAGCTGGTGAT 6640  
ATGGGATAGTGTTCACCCTTGTTACACCGTTTTTCCATGAG 6680  
CAAACCTGAAACGTTTTTCATCGCTCTGGAGTGAATACCACG 6720  
ACGATTTCCGGCAGTTTTCTACACATATATTCGCAAGATGT 6760  
GGCGTGTTACGGTGAAAACCTGGCCTATTTCCCTAAAGGG 6800

6810 6820 6830 6840  
TTTATTGAGAATATGTTTTTCGTCTCAGCCAATCCCTGGG 6840  
TGAGTTTTACCACTTTTGTATTTAAACGTGGCCAATATGGA 6880  
CAACTTCTTCGCCCCGTTTTTCACCATGGGCAAATATTAT 6920  
ACGCAAGGCGACAAGGTGCTGATGCCGCTGGCGATTTCAGG 6960  
TTCATCATGCCGTTTGTGATGGCTTCCATGTTCGGCAGAAT 7000

7010 7020 7030 7040  
GCTTAATGAATTACAACAGTACTGCGATGAGTGGCAGGGC 7040  
GGGGCGTAACCTAGGTGACAGAAGTCAAAGCCTCCGGTC 7080  
GGAGGCTTTTGACTTTCTGCTAGATCGGCCGCATCGAATA 7120  
TAACTTCGTATAATGTATGCTATACGAAGTTATTAGCGAT 7160  
GAGCTCGGACTTCCATTGTTTCAATCCACGGACAAAAACAG 7200

7210 7220 7230 7240  
AGAAAGGAAACGACAGAGGCCAAAAAGCTCGCTTTCAGCA 7240  
CCTGTCGTTTTCTTTCTTTTCAGAGGGTATTTTAAATAAA 7280  
AACATTAAGTTATGACGAAGAAGAACGGAAACGCCTTAAA 7320  
CCGGAATAATTTTCATAAATAGCGAAAACCCGCGAGGTCGC 7360  
CGCCCCGTAACCTGTCGGATCACCGGAAAGGACCCGTAAA 7400





8810 8820 8830 8840  
|-----|-----|-----|-----|  
CCAGCGCAGAAATATTTCCAGCAAATTCATTCTGCAATCG 8840  
GCTTGCATAACGCTGACCACGTTTCATAAGCACTTGTGGG 8880  
CGATAATCGTTACCCAATCTGGATAATGCAGCCATCTGCT 8920  
CATCATCCAGCTCGCCAACCAGAACACGATAATCACTTTC 8960  
GGTAAGTGCAGCAGCTTTACGACGGCGACTCCCATCGGCA 9000

9010 9020 9030 9040  
|-----|-----|-----|-----|  
ATTTCTATGACACCAGATACTCTTCGACCGAACGCCGGTG 9040  
TCTGTTGACCAGTCAGTAGAAAAGAAGGGATGAGATCATC 9080  
CAGTGCCTCCTCAGTAAGCAGCTCCTGGTCACGTTTATTA 9120  
CCTGACCATAACCGAGAGGTCTTCTCAACACTATCACCCC 9160  
GGAGCACTTCAAGAGTAAACTTTCACATCCCGACCACATA 9200

9210 9220 9230 9240  
|-----|-----|-----|-----|  
AGGCAAAGTAATGGCATTACCGCGAGCCATTACTCCTACG 9240  
CGCGCAATTAACGAATCCACCATCGGGCAGCTGGTGTCG 9280  
ATAACGAAGTATCTTCAACCGGTTGAGTATTGAGCGTATG 9320  
TTTTGGAATAACAGGCGCACGCTTCATTATCTAATCTCCC 9360  
AGCGTGGTTTAATCAGACGATCGAAAATTTTATTGCAGAC 9400

9410 9420 9430 9440  
|-----|-----|-----|-----|  
AGGTTCCCAAATAGAAAGAGCATTCTCCAGGCACCAGTT 9440  
GAAGAGCGTTGATCAATGGCCTGTTCAAAAACAGTTCTCA 9480  
TCCGGATCTGACCTTTACCAACTTCATCCGTTTCACGTAC 9520  
AACATTTTTTTAGAACCATGCTTCCCCAGGCATCCCGAATT 9560  
TGCTCCTCCATCCACGGGACTGAGAGCCATTACTATTGC 9600

9610 9620 9630 9640  
|-----|-----|-----|-----|  
TGTAATTTGGTAAGCAAATACGTACATCAGGCTCGAACCC 9640  
TTTAAGATCAACGTTCTTGAGCAGATCACGAAGCATATCG 9680  
AAAAACTGCAGTGCAGGAGGTGTAGTCAAACAACCTCAGCAG 9720  
GCGTGGGAACAATCAGCACATCAGCAGCACATACGACATT 9760  
AATCGTGCCGATACCCAGGTTAGGCGCGCTGTCAATAACT 9800

9810 9820 9830 9840  
|-----|-----|-----|-----|  
ATGACATCATAGTCATGAGCAACAGTTTCAATGGCCAGTC 9840  
GGAGCATCAGGTGTGGATCGGTGGGCAGTTTACCTTCATC 9880  
AAATTTGCCCATTAACCTCAGTTTCAATACGGTGCAGAGCC 9920  
AGACAGGAAGGAATAATGTCAAGCCCCGGCCAGCAAGTGG 9960  
GCTTTATTGCATAAGTGACATCGTCCTTTTCCCAAGATA 10000

10010 10020 10030 10040  
|-----|-----|-----|-----|  
GAAAGGCAGGAGAGTGTCTTCTGCATGAATATGAAGATCT 10040  
GGTACCCATCCGTGATACATTGAGGCTGTTCCCTGGGGGT 10080  
CGTTACCTTCCACGAGCAAACACGTAGCCCCTTCAGAGC 10120  
CAGATCCTGAGCAAGATGAACAGAAACTGAGGTTTTGTAA 10160  
ACGCCTCCTTTATGGGCAGCAACCCCGATCACCGGTGGAA 10200



```
      11610      11620      11630      11640
┌──────────┬──────────┬──────────┬──────────┐
ATGCCTGCCGTATATCCTTACTGGCTTCCGCAGAGGTCAA 11640
TCCGAATATTTT CAGCATATTTAGCAACATGGATCTCGCAG 11680
ATACCGTCATGTT CCTGTAGGGTGCCATCAGATTTTCTGA 11720
TCTGGTCAACGAACAGATACAGCATAACGTTTTTTGATCCCG 11760
GGAGAGACTATATGCCGCCTCAGTGAGGTCGTTTGACTGG 11800

      11810      11820      11830      11840
┌──────────┬──────────┬──────────┬──────────┐
ACGATTCGCGGGCTATTTTTACGTTTCTTGTGATTGATAA 11840
CCGCTGTTTCCGCCATGACAGATCCATGTGAAGTGTGACA 11880
AGTTTTTTAGATTGTCACACTAAATAAAAAAGAGTCAATAA 11920
GCAGGGATAACTTTGTGAAAAAACAGCTT 11949
```

LOCUS pSMARTBAC2\_UPRT-DHFR\_GRA1p\_SwStrp-MucOnly-3HA  
 15126 bp 22-JAN-2016  
 EMBL\_ID pSMARTBAC2\_UPRT-DHFR\_GRA1p\_SwStrp-MucOnly-3HA  
 15126 bp 01-OCT-2015  
 EMBL\_ID pSMARTBAC2\_UPRT-DHFR\_GRA1p\_SwStrp-MucOnly-3HA  
 15126 bp 31-AUG-2015  
 EMBL\_ID pSMARTBAC2\_UPRT-DHFR\_GRA1p\_SwStrp-MucOnly-3HA  
 15260 bp 25-AUG-2015  
 EMBL\_ID pSMARTBAC2\_UPRT-DHFR\_GRA1p\_SwStrp-MucOnly-3HA  
 15126 bp 25-AUG-2015  
 EMBL\_ID pSMARTBAC2\_UPRT-DHFR\_GRA1p\_SwStrp-MucOnly-3HA  
 15126 bp 12-SEP-2015  
 EMBL\_ID pSMARTBAC2\_UPRT-DHFR\_GRA1p\_SwStrp-MucOnly-3HA  
 15126 bp 08-OCT-2015  
 UNIMARK pSMARTBAC2 UPRT-DHFR GRA1p SwStrp-MucOnly-3HA  
 annotations  
 pSMARTBAC2 UPRT-DHFR GRA1p SwStrp-MucOnly-3HA

primer\_bind 9368..9436  
 /label="signal peptide CST1"  
 /ugene\_name="Misc.\ Feature"  
 /ugene\_group="Primer\ Binding\ Site"  
 primer complement(9449..9482)  
 /label="in-fusion 5'R"  
 Region 9452..9457  
 /label="cleavage site"  
 misc\_feature complement(9499..9569)  
 /label="105-4 vecR"  
 /ugene\_name="primer\_bind"  
 /ugene\_group="Misc.\ Feature"  
 protein\_bind 9500..9595  
 /mismatches=0  
 /label="TwinStrep"  
 misc\_feature 9550..9589  
 /label="105-4 MOF"  
 /ugene\_name="primer\_bind"  
 misc\_feature 9575..9614  
 /label="Strep2MucOnlyF"  
 /ugene\_name="primer\_bind"  
 primer\_bind complement(9611..9628)  
 /label="Null Primer R"

```
primer_bind      9611..9628
                  /mismatches=0
                  /label="MucSeqF"
Region           9629..10417
                  /label="Muc"
repeat_unit      9668..9707
                  /label="M1"
repeat_unit      9708..9733
                  /label="M2"
repeat_unit      9734..9763
                  /label="M3"
repeat_unit      9764..9793
                  /label="M4"
repeat_unit      9794..9823
                  /label="M5"
repeat_unit      9824..9856
                  /label="M6"
repeat_unit      9857..9886
                  /label="M7"
repeat_unit      9887..9916
                  /label="M8"
repeat_unit      9917..9946
                  /label="M9"
repeat_unit      9947..9976
                  /label="+M10"
repeat_unit      9977..10012
                  /label="M11"
repeat_unit      10013..10042
                  /label="M12"
repeat_unit      10043..10072
                  /label="M13"
repeat_unit      10073..10105
                  /label="M14"
repeat_unit      10106..10135
                  /label="M15"
repeat_unit      10136..10165
                  /label="M16"
repeat_unit      10166..10195
                  /label="M17"
repeat_unit      10196..10222
                  /label="M18"
repeat_unit      10223..10249
```

```
repeat_unit      /label="M19"
                 10250..10270
primer_bind      /label="M20"
                 10418..10435
primer_bind      /label="MucSeqR"
                 complement(10466..10485)
                 /mismatches=0
                 /label="101-colR2MO"
misc_feature     complement(10548..10577)
                 /label="105-4 MOr"
                 /ugene_name="primer_bind"
misc_feature     10558..10583
                 /label="105-4 HAf"
                 /ugene_name="primer_bind"
misc_feature     10568..10651
                 /label="3HA"
                 /ugene_name="protein_bind"
misc_feature     10653..11066
                 /label="3' UTR HXGPRT"
                 /ugene_name="3'UTR"
primer_bind      complement(10799..10819)
                 /mismatches=0
                 /label="LIC-tagging-seq-R"
misc_feature     complement(11051..11076)
                 /label="105-4 HAr"
                 /ugene_name="primer_bind"
misc_feature     11057..11096
                 /label="105-4 vecF"
                 /ugene_name="primer_bind"
misc_feature     11057..11076
                 /ugene_name="Misc.\ Feature"
                 /ugene_group="3'UTR"
3'UTR           complement(11067..11630)
                 /label="T2-3'UTR"
primer_bind      complement(11360..11379)
                 /mismatches=0
                 /label="ColR84-3"
primer_bind      complement(11610..11630)
                 /created_by="User"
                 /label="T2ko-3'F"
primer_bind      complement(11622..11661)
                 /label="pUC19wUPRT-vecF"
```

```
misc_feature      complement(11637..11670)
                  /mismatches=0
                  /ugene_name="loxP"
primer_bind       11646..11685
                  /label="DHFR-loxP-R"
CDS               complement(11671..13503)
                  /mismatches=0
primer_bind       complement(13487..13518)
                  /mismatches=0
                  /label="DHFR-loxP-F"
primer_bind       13499..13538
                  /mismatches=0
                  /label="TUBp-loxPr"
misc_feature      complement(13519..13552)
                  /ugene_name="loxP"
promoter          complement(13553..13871)
                  /label="alpha tubulin TUBA1 promoter"
misc_difference   complement(13679..13681)
                  /label="GTG->CTC"
misc_difference   complement(13722..13723)
                  /label="CC->GG"
promoter          13878..14010
                  /label="SAG1 promoter"
primer_bind       complement(14011..14030)
                  /mismatches=0
primer_bind       complement(14011..14047)
                  /label="DHFR-r-83-3"
primer_bind       14031..14051
                  /mismatches=0
                  /label="OpenF-UPRT3-83-3"
misc_recomb       14031..15126
                  /mismatches=0
                  /label="UPRT3' Recomb"
3'UTR            14044..14175
                  /label="UPRT 3'UTR"
misc_feature      complement(14207..15126)
                  /mismatches=0
                  /ugene_name="verified_seq"
primer_bind       complement(14273..14296)
                  /created_by="User"
                  /label="UPRT3' sequencing primer"
                  /note="Geneious type: primer_bind"
```

\_reverse"

primer\_bind complement(15106..15126)  
 /created\_by="User"  
 /label="UPRT3'R"  
 /note="Geneious type: primer\_bind

\_reverse"

ORIGIN

Features

misc\_feature 1..15126  
 /comment="Molecule is created with Unipro UGENE v1.16"  
 /ugene\_name="source"

source 6..7601  
 /organism="Cloning vector pSMART BAC v2.0"  
 /mol\_type="other DNA"  
 /db\_xref="taxon:480178"  
 /PCR\_primers="fwd\_name: SL1, fwd\_seq:  
 cagtccagttacgctggagtc, rev\_name: NZ-SR4, rev\_seq:  
 ttgaccatggttggtatgattt"  
 /PCR\_primers="fwd\_name: SP6 promoter, fwd\_seq:  
 tatttaggtgacactatagaa, rev\_name: T7 promoter, rev\_seq:  
 taatacgactcactataggg"  
 /label="source Cloning vector pSMART BAC v2.0"

primer\_bind complement(63..83)  
 /mismatches=0  
 /label="SR4-seqR"

rep\_origin 5793..6009  
 /note="ori2; oriS"  
 /label="ori2; oriS rep origin"

rep\_origin 6085..6699  
 /note="oriV"  
 /label="oriV rep origin"

primer\_bind 7525..7545  
 /mismatches=0  
 /label="SL1-seqF"

misc\_feature 7571..8381  
 /mismatches=0  
 /ugene\_name="verified\_seq"

primer\_bind 7582..7629  
 /created\_by="User"  
 /label="UPRT5'F w/ adapter"

primer\_bind 7608..7629  
 /created\_by="User"  
 /label="UPRT5'F"

misc\_recomb 7608..8758  
 /modified\_by="User"  
 /label="UPRT5' "

5'UTR 8362..8729  
 /Source="annotation"  
 /isDeprecated=0  
 /label="UPRT 5'UTR"

misc\_feature 8388..8565  
 /mismatches=0  
 /ugene\_name="verified\_seq"



|                                  |                        |
|----------------------------------|------------------------|
| misc_recomb                      | 7608..8758             |
| /modified_by="User"              |                        |
| /label="UPRT5' "                 |                        |
| 5' UTR                           | 8362..8729             |
| /Source="annotation"             |                        |
| /isDeprecated=0                  |                        |
| /label="UPRT 5' UTR"             |                        |
| misc_feature                     | 8388..8565             |
| /mismatches=0                    |                        |
| /ugene_name="verified_seq"       |                        |
| primer_bind                      | 8466..8488             |
| /created_by="User"               |                        |
| /label="UPRT5' seqencing primer" |                        |
| misc_feature                     | 8571..8600             |
| /mismatches=0                    |                        |
| /ugene_name="verified_seq"       |                        |
| misc_feature                     | 8712..8720             |
| /mismatches=0                    |                        |
| /ugene_name="verified_seq"       |                        |
| primer_bind                      | complement(8742..8758) |
| /mismatches=0                    |                        |
| /label="UPRT5'R-84"              |                        |
| misc_feature                     | 8744..8780             |
| /mismatches=0                    |                        |
| /label="GRApF-84"                |                        |
| /ugene_name="primer_bind"        |                        |
| promoter                         | 8759..9361             |
| /created_by="User"               |                        |
| /modified_by="User"              |                        |
| /label="GRA1promoter"            |                        |
| primer_bind                      | 8793..8810             |
| /label="GRA1p-colonyF"           |                        |
| primer_bind                      | 9294..9313             |
| /label="GRA1pSeqF"               |                        |
| primer_bind                      | complement(9337..9364) |
| /mismatches=0                    |                        |
| /label="GRApR-84"                |                        |
| primer_bind                      | 9344..9383             |
| /mismatches=0                    |                        |
| /label="CST1-strepII-F"          |                        |
| misc_difference                  | 9348..9348             |
| /label="deleted"                 |                        |



1210 1220 1230 1240  
CGCCGCCCCGTAACCTGTCGGATCACCGGAAAGGACCCGT 1240  
AAAGTGATAATGATTATCATCTACATATCACAACGTGCGT 1280  
GGAGGCCATCAAACCACGTCAAATAATCAATTATGACGCA 1320  
GGTATCGTATTAATTGATCTGCATCAACTTAACGTAAAAG 1360  
CAACTTCAGACAATACAAATCAGCGACACTGAATACGGGG 1400

1410 1420 1430 1440  
CAACCTCATGTCCGAGCTCGCGAGCTCGTCGACAGCGACA 1440  
CACTTGCATCGGATGCAGCCCGTTAACGTGCCGGCACGG 1480  
CCTGGGTAACCAGGTATTTTGTCCACATAACCGTGCGCAA 1520  
AATGTTGTGGATAAGCAGGACACAGCAGCAATCCACAGCA 1560  
GGCATAACAACCGCACACCGAGGTTACTCCGTTCTACAGGT 1600

1610 1620 1630 1640  
TACGACGACCATGTCAATACTTGCCCTTGACAGGCATTGA 1640  
TGGAATCGTAGTCTCACGCTGATAGTCTGATCGACAATAC 1680  
AAGTGGGACCGTGGTCCCAGACCGATAATCAGACCGACAA 1720  
CACGAGTGGGATCGTGGTCCCAGACTAATAATCAGACCGA 1760  
CGATACGAGTGGGACCGTGGTCCCAGACTAATAATCAGAC 1800

1810 1820 1830 1840  
CGACGATACGAGTGGGACCGTGGTCCCAGACTAATAATCA 1840  
GACCGACGATACGAGTGGGACCGTGGTCCCAGACTAATAA 1880  
TCAGACCGACGATACGAGTGGGACCGTGGTCCCAGACTAA 1920  
TAATCAGACCGACGATACGAGTGGGACCGTGGTCCCAGTC 1960  
TGATTATCAGACCGACGATACGAGTGGGACCGTGGTCCCA 2000

2010 2020 2030 2040  
GACTAATAATCAGACCGACGATACGAGTGGGACCGTGGTC 2040  
CCAGACTAATAATCAGACCGACGATACGAGTGGGACCGTG 2080  
GTCCCAGTCTGATTATCAGACCGACGATACAAGTGGAAACA 2120  
GTGGGCCCCAGAGAGAATATTCAGGCCAGTTATGCTTTCTG 2160  
GCCTGTAACAAAGGACATTAAGTAAAGACAGATAAACGTA 2200

2210 2220 2230 2240  
GACTAAAACGTGGTTCGCATCAGGGTGCTGGCTTTTCAAGT 2240  
TCCTTAAGAATGGCCTCAATTTTCTCTATACTCAGTTG 2280  
GAACACGAGACCTGTCCAGGTTAAGCACCATTTTATCGCC 2320  
CTTATACAATACTGTTCGCTCCAGGAGCAAACCTGATGTCGT 2360  
GAGCTTAAACTAGTTCTTGATGCAGATGACGTTTAAAGCA 2400

2410 2420 2430 2440  
CAGAAGTTAAAAGAGTGATAACTTCTTCAGCTTCAAATAT 2440  
CACCCAGCTTTTTTCTGCTCATGAAGGTTAGATGCCTGC 2480  
TGCTTAAGTAATCCTCTTTATCTGTAAAGGCTTTTTGAA 2520  
GTGCATCACCTGACCGGGCAGATAGTTCACCGGGGTGAGA 2560  
AAAAAGAGCAACAACCTGATTTAGGCAATTTGGCGGTGTTG 2600



4010 4020 4030 4040  
TAAACGCCTCCTTTATGGGCAGCAACCCCGATCACCGGTG 4040  
GAAATACGTCTTCAGCACGTTCGCAATCGCGTACCAAACAC 4080  
ATCACGCATATGATTAATTTGTTCAATTGTATAACCAACA 4120  
CGTTGCTCAACCCGTCTCGAATTTCCATATCCGGGTGCG 4160  
GTAGTCGCCCTGCTTTCTCGGCATCTCTGATAGCCTGAGA 4200

4210 4220 4230 4240  
AGAAACCCCAACTAAATCCGCTGCTTCACCTATTCTCCAG 4240  
CGCCGGGTATTTCCTCGCTTCCGGGCTGTCATCATTAA 4280  
ACTGTGCAATGGCGATAGCCTTCGTCATTTTCATGACCAGC 4320  
GTTTATGCACTGGTTAAGTGTTCATGAGTTTCATTCTG 4360  
AACATCCTTTAATCATTGCTTTGCGTTTTTTTATTAAATC 4400

4410 4420 4430 4440  
TTGCAATTTACTGCAAAGCAACAACAAAATCGCAAAGTCA 4440  
TCAAAAACCGCAAAGTTGTTTAAAATAAGAGCAACACTA 4480  
CAAAAGGAGATAAGAAGAGCACATACCTCAGTCACTTATT 4520  
ATCACTAGCGCTCGCCGCAGCCGTGTAACCGAGCATAGCG 4560  
AGCGAACTGGCGAGGAAGCAAAGAAGAACTGTTCTGTCAG 4600

4610 4620 4630 4640  
ATAGCTCTTACGCTCAGCGCAAGAAGAAATATCCACCGTG 4640  
GGAAAAACTCCAGGTAGAGGTACACACGCGGATAGCCAAT 4680  
TCAGAGTAATAAACTGTGATAATCAACCCTCATCAATGAT 4720  
GACGAACTAACCCCGATATCAGGTCACATGACGAAGGGA 4760  
AAGAGAAGGAAATCAACTGTGACAACTGCCCTCAAATTT 4800

4810 4820 4830 4840  
GGCTTCCTTAAAAATTACAGTTCAAAAAGTATGAGAAAAT 4840  
CCATGCAGGCTGAAGGAAACAGCAAAACTGTGACAAATTA 4880  
CCCTCAGTAGGTGAGAACAAATGTGACGAACCACCCTCAA 4920  
ATCTGTGACAGATAACCCTCAGACTATCCTGTCGTCATGG 4960  
AAGTGATATCGCGAAGGAAAATACGATATGAGTCGTCTG 5000

5010 5020 5030 5040  
GCGGCCTTTCTTTTTCTCAATGTATGAGAGGCGCATTGGA 5040  
GTTCTGCTGTTGATCTCATTAAACACAGACCTGCAGGAAGC 5080  
GGCGGCGGAAGTCAGGCATACGCTGGTAACTTTGAGGCAG 5120  
CTGGTAACGCTCTATGATCCAGTCGATTTTCAGAGAGACG 5160  
ATGCCTGAGCCATCCGGCTTACGATACTGACACAGGGATT 5200

5210 5220 5230 5240  
CGTATAAACGCATGGCATAACGGATTGGTGATTTCTTTTGT 5240  
TTCACTAAGCCGAAACTGCGTAAACCGGTTCTGTAACCCG 5280  
ATAAAGAAGGGAATGAGATATGGGTTGATATGTACTACTGT 5320  
AAAGCCCTCTGGATGGACTGTGCGCACGTTTGATAAACCA 5360  
AGGAAAAGATTTCATAGCCTTTTTTCATCGCCGGCATCCTCT 5400

5410 5420 5430 5440  
TCAGGGCGATAAAAAACCACTTCCTTCCCCGCGAAACTCT 5440  
TCAATGCCTGCCGTATATCCTTACTGGCTTCCGCAGAGGT 5480  
CAATCCGAATATTTAGCATATTTAGCAACATGGATCTCG 5520  
CAGATACCGTCAATGTTTCTGTAGGGTGCCATCAGATTTTC 5560  
TGATCTGGTCAACGAACAGATAACAGCATAACGTTTTTTGATC 5600  
5610 5620 5630 5640  
CCGGGAGAGACTATATGCCGCCTCAGTGAGGTCGTTTGAC 5640  
TGGACGATTTCGCGGGCTATTTTTTACGTTTCTTGTGATTGA 5680  
TAACCGCTGTTTCCGCCATGACAGATCCATGTGAAGTGTG 5720  
ACAAGTTTTTAGATTGTCACACTAAATAAAAAAGAGTCAA 5760  
TAAGCAGGGATAACTTTGTGAAAAAACAGCTTCTTCTGAG 5800  
5810 5820 5830 5840  
GGCAATTTGTCACAGGGTTAAGGGCAATTTGTCACAGACA 5840  
GGACTGTCATTTGAGGGTGATTTGTCACACTGAAAGGGCA 5880  
ATTTGTCACAACACCTTCTCTAGAACCAGCATGGATAAAG 5920  
GCCTACAAGGCGCTCTAAAAAAGAAGATCTAAAAACTATA 5960  
AAAAAAATAATTATAAAAAATATCCCCGTGGATAAGTGGAT 6000  
6010 6020 6030 6040  
AAACCCAAGGGAAGTTTTTTCAGGCATCGTGTGTAAGCAG 6040  
AATATATAAGTGCTGTTCCCTGGTGCTTCCTCGCTCACTC 6080  
GACCGGGAGGGTTCGAGAAGGGGGGCACCCCCCTTCGGC 6120  
GTGCGCGGTACGCGCACAGGGCGCAGCCCTGGTTAAAAA 6160  
CAAGGTTTATAAATATTGTTTAAAAGCAGGTTAAAAGAC 6200  
6210 6220 6230 6240  
AGGTTAGCGGTGGCCGAAAACGGGCGGAAACCCTTGCAA 6240  
ATGCTGGATTTTCTGCCTGTGGACAGCCCCTCAAATGTCA 6280  
ATAGGTGCGCCCCTCATCTGTGTCAGCACTCTGCCCTCAAG 6320  
TGTC AAGGATCGCGCCCCTCATCTGTGTCAGTAGTCGCGCCC 6360  
CTCAAGTGTC AATACCGCAGGGCACTTATCCCCAGGCTTG 6400  
6410 6420 6430 6440  
TCCACATCATCTGTGGGAAACTCGCGTAAAATCAGGCGTT 6440  
TTTCGCCGATTTGCGAGGCTGGCCAGCTCCACGTCGCCGGC 6480  
CGAAATCGAGCCTGCCCTCATCTGTCAACGCCGCGCCGG 6520  
GTGAGTCGGCCCCTCAAGTGTCAACGTCCGCCCTCATCT 6560  
GTCAGTGAGGGCCAAGTTTTTCCGCGAGGTATCCACAACGC 6600  
6610 6620 6630 6640  
CGGCGGCCGGCCGCGGTGTCTCGCACACGGCTTCGACGGC 6640  
GTTTCTGGCGGTTTGCAGGGCCATAGACGGCCGCCAGCC 6680  
CAGCGGCGAGGGCAACCAGCCGAGGGCTTCGCCCTGTGCG 6720  
TCGACTGCGGCGAGCACTACTGGCTGTAAAAGGACAGACC 6760  
ACATCATGTTTCTGTGTTTATTAGGTTGTTCTGTCCATTG 6800

6810 6820 6830 6840  
CTGACATAATCCGCTCCACTTCAACGTAACACCGCACGAA 6840  
GATTTCTATTGTTCTGAAGGCATATTCAAATCGTTTTTCG 6880  
TTACCGCTTGCAGGCATCATGACAGAACACTACTTCCTAT 6920  
AAACGCTACACAGGCTCCTGAGATTAATAATGCGGATCTC 6960  
TACGATAATGGGAGATTTTCCCGACTGTTTCGTTTCGCTTC 7000  
7010 7020 7030 7040  
TCAGTGGATAACAGCCAGCTTCTCTGTTTAAACAGACAAAA 7040  
ACAGCATATCCACTCAGTTCACATTTCCATATAAAGGCC 7080  
AAGGCATTTATTCTCAGGATAATTGTTTCAGCATCGCAAC 7120  
CGCATCAGACTCCGGCATCGCAAACCTGCACCCGGTGCCGG 7160  
GCAGCCACATCCAGCGCAAAAACCTTCGTGTAGACTTCCG 7200  
7210 7220 7230 7240  
TTGAACTGATGGACTTATGTCCCATCAGGCTTTGCAGAAC 7240  
TTTCAGCGGTATAACCGGCATACAGCATGTGCATCGCATAG 7280  
GAATGGCGGAACGTATGTGGTGTGACCGGAACAGAGAACG 7320  
TCACACCGTTCAGCAGCAGCGGCGCAACCGCCTCCCCAAT 7360  
CCAGGTCTTGACCGTTCTGTCCGTCACTTCCCAGATCCGC 7400  
7410 7420 7430 7440  
GCTTTCTCTGTCTTCCCTGTGCGACGGTTACGCCGCTCCA 7440  
TGAGCTTATCGGGTCCACTCGCGAACGCAGAAAGGCCAC 7480  
CCGAAGGTGAGCCAGTGTGATTACATTTGCGGCCTAACTG 7520  
TGGCCAGTCCAGTTACGCTGGAGTCACTAGTATTTAGGTG 7560  
ACACTATAGAAGCGGCCGCGACAACCTTGTCCACGTGGAAT 7600  
7610 7620 7630 7640  
TGTTAACGTGAGCTCATGCTGGAGCTTCGTATGGATAGGG 7640  
TTACCCTGGTACACTCGGAAATGTTCTTTGAACGCGGCTG 7680  
GTGTGGCTTCTTGTCCCTGGGTGTTTCTCCTCCTCCTCG 7720  
ACACGTGTTTTTTTCTGCTTTTTCTGCGCCACCCGCTGT 7760  
GCCTAGTATCGAAAGCTGTAGAGTTGCCACCCTGATCTTC 7800  
7810 7820 7830 7840  
TCCCTTCCAACCTCTCCGCTTCGACACACCCCCCAACGACT 7840  
TGTTGTGAAGCTCTGGCCCCCTGTTTCGGTTGTGACAGG 7880  
CTCTCCAGGCGCTCTTGCACTCTCCAGTCCAGCTGGTGTG 7920  
ATAGAACC GTTATCTCTAGAGTGCCACGAAAGAGCCCCCT 7960  
CCTTTTATTTCGTTGTTTCCCCTGGGTACGAGCTATCTTGT 8000  
8010 8020 8030 8040  
GGCTTTCTTTGCTTGGGGATGACCCTTGTTCGTGACCTTCT 8040  
ATGCGTTCTCGATGAGAAACCGTCGACTCTTCGTTGCATG 8080  
CAGGGGTTTCTGCGCGAAGATACTCTCCACAGAGCCACA 8120  
GAAAGTGGTAGCCGCTGTTTTCCAACGCAGCGTACGTACC 8160  
TAGAGATCCTTCCAGGAAACGCTGAGCCTCCGCTGTGACT 8200

8210 8220 8230 8240  
GATTTTCTGCACGTTGGCACGTGGATATCGCGATCCCCTG 8240  
TCCCCTCCACTGCATGCAGTGTGGCGGTAAGACGAGGGCC 8280  
ATATCGATCCCATGGCAGCTGCTGTGTGGGGTGCCGCCAT 8320  
ACGTAGGGGTACGATTTCTGGTCTTGCCTCAACTTCCC GCC 8360  
TGTTGATTTCGAGCAACTTACAAGGACAAGGCAATTAACC 8400

8410 8420 8430 8440  
ATCTTGCTATTTTTCTGTTTTCTGTCGTCATCGGCTGTCC 8440  
TAGCTCTCACGGCTACCCATCGTTTTTCCAAGCGCTGTCA 8480  
AGTGATGCCATTGGTTACTACTGGACAAAGGCCCTGCAAAT 8520  
ACGCGTGCCTCCATCATCGATCCCCCTTTATCTACTTTCT 8560  
CGCTTTCCGTTATCCCTTCTGTCTGCTTTTTTCTTTTCTCG 8600

8610 8620 8630 8640  
GCTCCATCTCATTCCCCTCGTTCCTTGTAGCGGCCCGGC 8640  
TTCTACGTTCCGCCTGCGATTCCCGTATTGGTCACGCCTC 8680  
CACAAAGCGTATTCCTTTTTTCTGTCGGACCTTCCACAGG 8720  
GCTTCTAAAATGGCGCAGGTCCCAGCGAGCGGAAAGCTCG 8760  
AAGGCTGTAGTACTGGTGCTCGTATGCGACACGCGGATTC 8800

8810 8820 8830 8840  
ACGGCGTATGCGACAAGCGGGATTGCTGATGAGCGTCGTT 8840  
CCCCACTGAAGCGCGCGGAGTGGTGGGCGACCACCGGTCA 8880  
CCTGGCGTCTCAGCTGCGCGAGGCACCCCTCTCATAGCGT 8920  
GGTACTCGTACGAATAACCAATCGCTGGGGTTCGCGGCGGG 8960  
AGGAATATGCTGTTTGTGACCATAACGATCACGCTGAACG 9000

9010 9020 9030 9040  
AAAACATGGTATGAGACGCCGTAAGCGGGCACAGGTTGTT 9040  
TGCCCTCGTCTCATTGCGGACCAATTCCCGGTCCACCGCT 9080  
GCGTCTCGACTCGACGGTGTGACCACCCACTTCGCATT 9120  
GGGCAGTCGGTAAAGCCACAACATTACTTTGCAATTTTAT 9160  
CGGTTGAAACTGCCGAGCGAGCTTGCCTTTTTTGGGTGCTA 9200

9210 9220 9230 9240  
TCTTCTCCACCTTTTATCAGTTAAGTTGTACAGTGAGTG 9240  
TCAGCTTGTTCGACACGTCTGTATAGACGCAACTCGGTT 9280  
TGCTTGTGTTGTTTGGTGGCTGGCCAAATCAAAGGCTATT 9320  
CATTTTTCACTTGCTGTTGTTCTTTGAAGAAATCAAGCAA 9360  
GATGAAATTATCTTATTTCTTTTTTCGCGCTGTCAAGCAGT 9400

9410 9420 9430 9440  
GGAGCAACCCTGCTTTTATTCGCCGTTACGCAGCTAGCAA 9440  
CCCAGGTGTCCGGGTTTCGATCTGGAAGAACCCCGAGATCT 9480  
GAGGCATGAGATGAAGAAATCGGCTTGGTTCGCACCCGCAA 9520  
TTTGAAAAAGGTGGAGGGTTCGGGCGGCGTTTCGGGAGGTT 9560  
CCGCATGGTCTCATCCTCAGTTCGAGAAGGGCGGTGGATG 9600









13810 13820 13830 13840  
GACACATCCCCTTCGTGCGCGCGCATCTCCACCGGTCCAA 13840  
CCAGGATACCAACCGCACCCAATGCAGGCAAGCTTAACC 13880  
ACAAACCTTGAGACGCGTGTTCCAACCACGCACCCTGACA 13920  
CGCGTGTTCACACCACGCACCCTGAGACGCGTGTTCCTAAC 13960  
CACGCACCCTGAGACGCGTGTTCCTAACACGCACCCTGAG 14000  
14010 14020 14030 14040  
ACGCGTGTTCAGCTTATCGATACCGTCGATGGAACCATG 14040  
TAGGTCTCTAGTTTTTTTTGACAGACCGCTGACGGAATCGC 14080  
GGACTGGAAGAAGCACGCCTCAAGAGGATAAACACCATTT 14120  
TTATTTTTGTCTCGCTCCCACGTCCTCACCATCGGCAGG 14160  
AACACAGAAAAAAGTTTTAGTTGTGAGGCTGCCTGGTGC 14200  
14210 14220 14230 14240  
GCGACAAGCAGTTGCGCTTTTTTGTGCCACGGGGTATATC 14240  
TTTTGGTCGCGCTCCTGTCACGACTGTTGTTAGTCATGGAC 14280  
CGGACGATTTCTTCGTATCAGGCACAGAGTCCCGTACACC 14320  
TGTAACGGGAATGTTTACGAGGCGGCGTGCATCCCGTTCC 14360  
TCGTCCATCTCGAGTTTTATTTCCCTTTCCCTTTGTTTCGAG 14400  
14410 14420 14430 14440  
ATTCTGCTGTCCAGAACGAGACAGGGAAGCGAAGTGGTAG 14440  
TGCCAGGAAGGGCGCAGCTTAATTGCTCCTCTTCACCTTA 14480  
AGTCGTTTACTTGTGCCAAGAAGTGTCTTCACGATTAC 14520  
CTTGTGTGTTTTCCGCCGTTCTTTGCTTTTTTGTTCGCGCTG 14560  
CTCGGAAACATTTACAACCTCATATCTAGATGTTGTTGAA 14600  
14610 14620 14630 14640  
GCAATGTGAAGAATGGTCCACGTTACATTCTCTAACGGAA 14640  
TTTTAACGGTGTGGGATGGACAAGCAATGCATATGCGATG 14680  
TCGAAACCTCGAAAACCGTAATGTGCGACCACGTCCTGG 14720  
GTGAAGCAAACGCGTTTTCCACATACAGTCGGTATCGATGT 14760  
CACGCTTGCCAGTTCGTGTAGGGAAGTTGGCGTGTTTTTT 14800  
14810 14820 14830 14840  
TTTCCACGGTGGGGATTGAACAGTGTCATTGCCCAGACCA 14840  
TGGCAGTACCAAGTCTGCTCTGATGAAGTGCGCCACCAGC 14880  
ATTCTGTTTTTTTCGCTCCCACGAGGGTGAACCTCTAGCA 14920  
CACAACTTCTCTTCTGAGGTTGCCGAAAAACTGTCTGC 14960  
TAATTTATCGAGTTATTTGAACTACGGGACCAACGGGCAG 15000  
15010 15020 15030 15040  
AGACTGTTTTTCACTCGGATGTCGTACAGTTGACGTCGCGA 15040  
CGAAAGGCACATGACCAAGGCGATTTTTTTTTTATTTTCTGG 15080  
TTCATCCGGCTATCCACCAGTGTGCTTCGGTCGATCGAA 15120  
CGCCAG 15126
